# Supplementary material for: The effect of emission source chemical profiles on simulated PM 2.5 components: sensitivity analysis with the Community Multiscale Air Quality (CMAQ) modeling system version 5.0.2
Source: Copernicus journal article supplement (doi:10.5194/gmd-16-6757-2023), 2023-11-22
Supplement: Supplementary file 1 [file gmd-16-6757-2023-supplement.pdf]

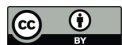

*Supplement of*

**The effect of emission source chemical profiles on simulated PM<sub>2.5</sub> components: sensitivity analysis with the Community Multiscale Air Quality (CMAQ) modeling system version 5.0.2**

**Zhongwei Luo et al.**

*Correspondence to:* Yufen Zhang (zhafox@nankai.edu.cn) and Yinchang Feng (fengyc@nankai.edu.cn)

The copyright of individual parts of the supplement might differ from the article licence.

|                                                                                                                                                         |    |
|---------------------------------------------------------------------------------------------------------------------------------------------------------|----|
| This supplement material contains 28 tables and 10 figures.....                                                                                         | 1  |
| Table S1 The simulation error of chemical transport models (CTMs) on the components of PM <sub>2.5</sub> in different studies.....                      | 1  |
| Table S2 The main model configurations in this work.....                                                                                                | 5  |
| Table S3 Power plant source profiles from published literatures in China, SPAP and SPECIATE database.....                                               | 6  |
| Table S4 Industrial process (Sintering) source profiles from published literatures in China, SPAP and SPECIATE database.....                            | 8  |
| Table S5 Industrial process (Iron-making) source profiles from published literatures in China, SPAP and SPECIATE database.....                          | 8  |
| Table S6 Industrial process (Steelmaking) source profiles from published literatures in China, SPAP and SPECIATE database.....                          | 9  |
| Table S7 Industrial process (Cement) source profiles from published literatures in China, SPAP and SPECIATE database.....                               | 10 |
| Table S8 Transportation sector (Heavy duty gasoline) source profiles from published literatures in China, SPAP and SPECIATE database.....               | 11 |
| Table S9 Transportation sector (Light diesel) source profiles from published literatures in China, SPAP and SPECIATE database.....                      | 12 |
| Table S10 Transportation sector (Light duty gasoline) source profiles from published literatures in China, SPAP and SPECIATE database.....              | 13 |
| Table S11 Residential coal combustion source profiles from published literatures in China, SPAP and SPECIATE database.....                              | 14 |
| Table S12 Monitoring sites information.....                                                                                                             | 16 |
| Table S13 The variations of simulated PM <sub>2.5</sub> and its components in CMAQ_SPE relative to that in CMAQ_SPA for other monitoring sites (%)..... | 16 |
| Table S14 The sensitivity coefficients ( $\delta$ ) of simulated components in case DBL at different monitoring sites.....                              | 17 |
| Table S15 The sensitivity coefficients ( $\delta$ ) of simulated components in case DBP at different monitoring sites.....                              | 17 |
| Table S16 The sensitivity coefficients ( $\delta$ ) of simulated components in case DBS at different monitoring sites.....                              | 18 |
| Table S17 The sensitivity coefficients ( $\delta$ ) of simulated components in case TPS at different monitoring sites.....                              | 18 |
| Table S18 The sensitivity coefficients ( $\delta$ ) of simulated components in case TWN at different monitoring sites.....                              | 19 |
| Table S19 The sensitivity coefficients ( $\delta$ ) of simulated components in case FON at different monitoring sites.....                              | 19 |
| Table S20 The sensitivity coefficients ( $\delta$ ) of simulated components in case OHA at different monitoring sites.....                              | 20 |
| Table S21 The sensitivity coefficients ( $\delta$ ) of simulated components in case THA at different monitoring sites.....                              | 20 |
| Table S22 Equilibrium relations and $K$ used in ISORROPIA II.....                                                                                       | 21 |
| Table S23 Main reactions related to sulfate and nitrate production in CMAQ.....                                                                         | 22 |
| Table S24 Calculation method for sensitivity coefficient of gaseous pollutants.....                                                                     | 23 |

|                                                                                                                                                                                               |    |
|-----------------------------------------------------------------------------------------------------------------------------------------------------------------------------------------------|----|
| Table S25 The sensitivity coefficients ( $\delta$ ) of gas pollutants from different cases at different monitoring sites.....                                                                 | 23 |
| Table S26 The selected information of source profile in SPECIATE and SAPPCC database...                                                                                                       | 25 |
| Table S27 Potential species for the five aerosol types .....                                                                                                                                  | 27 |
| Table S28 The sensitivity coefficients ( $\delta$ ) of simulated components for different meteorological pattern .....                                                                        | 27 |
| Figure S1 The regional distribution of PM <sub>2.5</sub> emission sources. (a) coal-fired power plant; (b) industry process; (c) transportation sector; (d) residential coal combustion. .... | 29 |
| Figure S2 The coefficient divergence values for PP source profile .....                                                                                                                       | 30 |
| Figure S3 The coefficient divergence values for IN source profile.....                                                                                                                        | 30 |
| Figure S4 The coefficient divergence values for TR source profile.....                                                                                                                        | 31 |
| Figure S5 The coefficient divergence values for RE source profile.....                                                                                                                        | 32 |
| Figure S6 The selected speciation profile of PM <sub>2.5</sub> for case CMAQ_SPE and CMAQ_SPA .                                                                                               | 32 |
| Figure S7 The sketch of sensitivity experiment design idea .....                                                                                                                              | 33 |
| Figure S8 The general solution path of ISORROPIA for each grid at time $t$ .....                                                                                                              | 34 |
| Figure S9 The elbow plot of K-mean clustering .....                                                                                                                                           | 34 |
| Figure S10 The shift direction of chemical reaction equilibrium.....                                                                                                                          | 34 |
| Reference .....                                                                                                                                                                               | 35 |

This supplement material contains 28 tables and 10 figures.

Table S1 The simulation error of chemical transport models (CTMs) on the components of PM<sub>2.5</sub> in different studies

| PM <sub>2.5</sub> components  | Model         | NMB                          | R    | Study area     | Period                | Reference            |
|-------------------------------|---------------|------------------------------|------|----------------|-----------------------|----------------------|
| SO <sub>4</sub> <sup>2-</sup> | CMAQv4.7.1    | -45%                         | 0.73 | Eastern China  | 2010                  | (Cheng et al., 2015) |
| NO <sub>3</sub> <sup>-</sup>  |               | 29%                          | 0.82 |                |                       |                      |
| SO <sub>4</sub> <sup>2-</sup> | CMAQv4.7.1    | -4.5%                        | 0.87 | Qing Dao       | Jan. 2016             | (Zhang et al., 2017) |
| NO <sub>3</sub> <sup>-</sup>  |               | 10%                          | 0.87 |                |                       |                      |
| NH <sub>4</sub> <sup>+</sup>  |               | -6%                          | 0.9  |                |                       |                      |
| SO <sub>4</sub> <sup>2-</sup> | CMAQv5.0.1    | -54%                         | 0.6  | Northern China | 2013                  | (Zheng et al., 2015) |
| NO <sub>3</sub> <sup>-</sup>  |               | -40%                         | 0.8  |                |                       |                      |
| NH <sub>4</sub> <sup>+</sup>  |               | -58%                         | 0.7  |                |                       |                      |
| OC                            |               | -25%                         | 0.8  |                |                       |                      |
| EC                            |               | 196%                         | 0.6  |                |                       |                      |
| SO <sub>4</sub> <sup>2-</sup> | Revised CMAQ  | 6%                           | 0.7  | Northern China | 2013                  | (Zheng et al., 2015) |
| NO <sub>3</sub> <sup>-</sup>  |               | 6%                           | 0.8  |                |                       |                      |
| NH <sub>4</sub> <sup>+</sup>  |               | -4%                          | 0.8  |                |                       |                      |
| OC                            |               | -28%                         | 0.7  |                |                       |                      |
| EC                            |               | 183%                         | 0.6  |                |                       |                      |
| SO <sub>4</sub> <sup>2-</sup> | WRF-Chem3.6.1 | -84%                         | 0.31 | Nanjing        | Jan. 2017             | (Sha et al., 2019)   |
| SO <sub>4</sub> <sup>2-</sup> |               | -71%                         | 0.26 |                | Apr. 2017             |                      |
|                               |               | NO <sub>3</sub> <sup>-</sup> | 45%  |                | 0.51                  |                      |
| NO <sub>3</sub> <sup>-</sup>  |               |                              | 67%  |                | 0.32                  |                      |
|                               |               | NH <sub>4</sub> <sup>+</sup> | -34% |                | 0.27                  |                      |
| NH <sub>4</sub> <sup>+</sup>  |               |                              | -13% |                | 0.31                  |                      |
| SO <sub>4</sub> <sup>2-</sup> | CMAQv5.0.2    | -41%                         | 0.82 | Qing Dao       | Dec. 2015 ~ Jan. 2016 | (Gao et al., 2020)   |

|                               |            |              |      |         |                   |                      |
|-------------------------------|------------|--------------|------|---------|-------------------|----------------------|
| NO <sub>3</sub> <sup>-</sup>  | RAQMS      | 41%          | 0.83 | Beijing | Feb. to Mar. 2014 | (Li et al., 2020)    |
| NH <sub>4</sub> <sup>+</sup>  |            | -5%          | 0.83 |         |                   |                      |
| SO <sub>4</sub> <sup>2-</sup> |            | -4%          | 0.83 |         |                   |                      |
| NO <sub>3</sub> <sup>-</sup>  |            | -4%          | 0.77 |         |                   |                      |
| NH <sub>4</sub> <sup>+</sup>  |            | 4%           | 0.81 |         |                   |                      |
| OC                            |            | -39%         | 0.92 |         |                   |                      |
| EC                            |            | -9%          | 0.81 |         |                   |                      |
| SO <sub>4</sub> <sup>2-</sup> | CMAQv5.0.1 | -56%~-29%    | -    | China   | 2013              | (Shi et al., 2017)   |
| NO <sub>3</sub> <sup>-</sup>  |            | -47%~-19%    |      |         |                   |                      |
| NH <sub>4</sub> <sup>+</sup>  |            | -44%~-1      |      |         |                   |                      |
| SO <sub>4</sub> <sup>2-</sup> | CMAQv4.7   | -16% and -6% | -    | USA     | Jan. 2006         | (Foley et al., 2010) |
|                               |            | -19%~-0.2%   |      |         | Aug. 2006         |                      |
| NO <sub>3</sub> <sup>-</sup>  |            | -5% and 1%   |      |         | Jan. 2006         |                      |
| NH <sub>4</sub> <sup>+</sup>  |            | 13% and 14%  |      |         | Jan. 2006         |                      |
|                               |            | 15% and -6%  |      |         | Aug. 2006         |                      |
| OC                            |            | -20%         |      |         | Jan. 2006         |                      |
|                               |            | -49%         |      |         | Aug. 2006         |                      |
| EC                            |            | -25%         |      |         | Jan. 2006         |                      |
|                               | -32%       | Aug. 2006    |      |         |                   |                      |
| SO <sub>4</sub> <sup>2-</sup> | CMAQv4.5.1 | -34%~7%      | -    | USA     | Jan. 2002         | (Liu et al., 2010)   |
|                               |            | -18%~-37%    |      |         | Jul. 2002         |                      |
| NO <sub>3</sub> <sup>-</sup>  |            | 16%~118%     |      |         | Jan. 2002         |                      |
|                               |            | -69%~88%     |      |         | Jul. 2002         |                      |
| NH <sub>4</sub> <sup>+</sup>  |            | -0.5%~61%    |      |         | Jan. 2002         |                      |
|                               |            | -43%~53%     |      |         | Jul. 2002         |                      |

|                               |            |               |      |                      |           |                     |
|-------------------------------|------------|---------------|------|----------------------|-----------|---------------------|
| OC                            |            | -4%~13%       |      |                      | Jan. 2002 |                     |
|                               |            | -71%~-64%     |      |                      | Jul. 2002 |                     |
| EC                            |            | -16%~18%      |      |                      | Jan. 2002 |                     |
|                               |            | -39%~38%      |      |                      | Jul. 2002 |                     |
| SO <sub>4</sub> <sup>2-</sup> | CMAQv4.5.1 | 5%            | 0.7  | South Eastern<br>USA | Jan. 2002 |                     |
|                               | CAMx-4.4.2 | 33%           | 0.6  |                      | Jul. 2002 |                     |
|                               | CMAQv4.5.1 | -39%          | 0.5  |                      |           |                     |
|                               | CAMx-4.4.2 | -9%           | 0.6  |                      |           |                     |
| NO <sub>3</sub> <sup>-</sup>  | CMAQv4.5.1 | 46%           | 0.8  |                      | Jan. 2002 |                     |
|                               | CAMx-4.4.2 | -21%          | 0.8  |                      | Jul. 2002 |                     |
|                               | CMAQv4.5.1 | -62%          | 0.2  |                      |           |                     |
|                               | CAMx-4.4.2 | -80%          | 0.2  |                      |           |                     |
| NH <sub>4</sub> <sup>+</sup>  | CMAQv4.5.1 | -7%           | 0.8  | Jan. 2002            |           |                     |
|                               | CAMx-4.4.2 | -8%           | 0.7  | Jul. 2002            |           |                     |
|                               | CMAQv4.5.1 | -52%          | 0.7  |                      |           |                     |
|                               | CAMx-4.4.2 | -45%          | 0.7  |                      |           |                     |
| OC                            | CMAQv4.5.1 | -15%          | 0.8  | Jan. 2002            |           |                     |
|                               | CAMx-4.4.2 | -18%          | 0.8  | Jul. 2002            |           |                     |
|                               | CMAQv4.5.1 | -73%          | 0.7  |                      |           |                     |
|                               | CAMx-4.4.2 | -47%          | 0.7  |                      |           |                     |
| EC                            | CMAQv4.5.1 | -9%           | 0.7  | Jan. 2002            |           |                     |
|                               | CAMx-4.4.2 | 5%            | 0.7  | Jul. 2002            |           |                     |
|                               | CMAQv4.5.1 | -47%          | 0.4  |                      |           |                     |
|                               | CAMx-4.4.2 | -33%          | 0.4  |                      |           |                     |
| SO <sub>4</sub> <sup>2-</sup> | CMAQv5.0   | 0.7% and -31% | 0.85 | USA                  | 1990-2010 | (Xing et al., 2015) |

|                               |            |           |      |            |           |                        |
|-------------------------------|------------|-----------|------|------------|-----------|------------------------|
|                               |            | -2%       | 0.61 | Europe     |           |                        |
| NO <sub>3</sub> <sup>-</sup>  |            | 56%~59%   | 0.66 | USA        |           |                        |
|                               |            | -6%       | 0.70 | Europe     |           |                        |
| NH <sub>4</sub> <sup>+</sup>  |            | -13%      | 0.52 | USA        |           |                        |
|                               |            | 34%       | 0.62 | Europe     |           |                        |
| SO <sub>4</sub> <sup>2-</sup> | CMAQv4.5   | -16%      | 0.82 | USA        | 2002~2008 | (Friberg et al., 2016) |
| NO <sub>3</sub> <sup>-</sup>  |            | 72%       | 0.64 |            |           |                        |
| NH <sub>4</sub> <sup>+</sup>  |            | 13%       | 0.68 |            |           |                        |
| OC                            |            | -30%      | 0.39 |            |           |                        |
| EC                            |            | -22%      | 0.5  |            |           |                        |
| SO <sub>4</sub> <sup>2-</sup> | CMAQv5.0.2 | -50%~29%  | -    | California | 2013      | (Chen et al., 2020)    |
| NO <sub>3</sub> <sup>-</sup>  |            | -27%~48%  |      |            |           |                        |
| NH <sub>4</sub> <sup>+</sup>  |            | -32%~130% |      |            |           |                        |
| OC                            |            | -35%~13%  |      |            |           |                        |
| EC                            |            | 0~43%     |      |            |           |                        |

Table S2 The main model configurations in this work

| Model | Description                                                                                                                                                                                                                                                                                                                                                                                                                                                                                                                                                                                                                                                                                                                                                                                                                                                                                                                                                                                                                                                                  |
|-------|------------------------------------------------------------------------------------------------------------------------------------------------------------------------------------------------------------------------------------------------------------------------------------------------------------------------------------------------------------------------------------------------------------------------------------------------------------------------------------------------------------------------------------------------------------------------------------------------------------------------------------------------------------------------------------------------------------------------------------------------------------------------------------------------------------------------------------------------------------------------------------------------------------------------------------------------------------------------------------------------------------------------------------------------------------------------------|
| WRF   | Three nested domains covering the inland China with grid resolutions of 36 km × 36 km, 12 km × 12 km and 4 km × 4 km were set for the simulation domains. The initial and boundary conditions for WRF were based on the North American Regional Reanalysis data archived at National Center for Atmospheric Research (NCAR, <a href="https://doi.org/10.5065/D6M043C6">https://doi.org/10.5065/D6M043C6</a> ). In addition, surface ( <a href="https://doi.org/10.5065/4F4P-E398">https://doi.org/10.5065/4F4P-E398</a> ) and upper ( <a href="https://doi.org/10.5065/39C5-Z211">https://doi.org/10.5065/39C5-Z211</a> ) air observations obtained from NCAR were used to further refine the analysis data through data assimilation.                                                                                                                                                                                                                                                                                                                                       |
| CMAQ  | The CMAQ model version 5.0.2 was used to simulate air quality over the modeling period. The modeling was conducted from Oct. 1 to Oct.30 in 2018. Gas phase chemistry was based on CB05 (Carbon Bond 05) mechanism, the aerosol dynamics/chemistry was based on aero6 (Sixth-generation modal CMAQ aerosol model) module (cb05tucl_ae6_aq) (Yarwood et al., 2005; Whitten et al., 2010), ISORROPIA II inorganic chemical mechanism (Fountoukis and Nenes, 2007) was adopted. The CMAQ were two nested modeling domains which took Dom2 and Dom3 from WRF, but both indented 6 grids each side to reduce the impact of the boundary effect, and we excluded the first 7 days CMAQ simulation results to minimize the impact of initial conditions. PM size representation was based on three log-normal modes (nuclei, accumulation, coarse) (Chapel Hill, 2012).                                                                                                                                                                                                             |
| MEIC  | The Multi-resolution Emission Inventory for China (MEIC) model has been developed and maintained by Tsinghua University since 2010, aiming to build a high-resolution inventory of anthropogenic air pollutants and carbon dioxide emissions in China. Anthropogenic emission data from the monthly MEIC which include five types of emission categories (power plant, industry, residential, vehicle and agriculture) at the year 2017 were used. The inventory contains the emissions of ten major species (including sulfur dioxide (SO <sub>2</sub> ), nitrogen oxides (NO <sub>x</sub> ), carbon monoxide (CO), non-methane volatile organic compounds, ammonia (NH <sub>3</sub> ), fine particulate matter (PM <sub>2.5</sub> ), coarse particulate matter (PM <sub>10</sub> ), black carbon (BC), organic carbon (OC) and carbon dioxide (CO <sub>2</sub> ) ( <a href="http://meicmodel.org/">http://meicmodel.org/</a> ) (Liu et al., 2017a; Zheng et al., 2018). In addition, the Inventory Spatial Allocate Tool (ISAT) was used in this work (Wang et al., 2019). |



Table S3 Power plant source profiles from published literatures in China, SPAP and SPECIATE database

| Year      | SO <sub>4</sub> <sup>2-</sup> | NO <sub>3</sub> <sup>-</sup> | Cl <sup>-</sup> | NH <sub>4</sub> <sup>+</sup> | Na   | K   | Mg   | Ca   | OC   | EC   | Fe  | Mn    | Al   | Si   | Ti   | Other | City/Region    | Data source          |
|-----------|-------------------------------|------------------------------|-----------------|------------------------------|------|-----|------|------|------|------|-----|-------|------|------|------|-------|----------------|----------------------|
| 2005~2006 | 2.9                           | 0.6                          | 3.4             | 0.1                          | 1    | 0.3 | 0.5  | 2.5  | 34   | 4    | 2   | 0.05  | 1.7  |      | 0.1  | 46.9  | Southern China | (Liu, 2007)          |
| 2006      | 23                            |                              | 0.7             | 4                            |      |     | 0.7  | 5.5  | 2    | 0.3  | 2   |       | 4.2  |      |      | 57.6  | Shang Hai      | (Zheng et al., 2013) |
| 2009~2013 | 0.8                           | 0.2                          | 0.1             |                              | 0.3  | 0.8 |      | 1.7  | 0.3  | 1.8  | 2   |       | 15.1 | 20.3 | 0.6  | 56    | Shijiazhuang   | (Qi et al., 2015)    |
| 2012      | 5.8                           | 1.5                          | 1.8             | 0.6                          | 1    | 2.6 | 2    | 3    | 13   | 0.4  | 0.9 | 0.03  | 2.3  | 12.8 | 0.1  | 52.2  | Beijing        | (Ma et al., 2015)    |
| 2013      | 2.4                           | 0.2                          |                 | 0.03                         | 2.2  | 0.2 | 0.9  | 8.8  | 4    | 0.8  | 0.8 | 0.04  | 5.7  | 7.5  |      | 66.4  | Changzhou      | (Teng et al., 2015)  |
| 2015~2016 | 8.7                           | 0.9                          | 16.5            | 4.9                          | 2.1  | 3.9 | 1.1  | 9.6  | 4.2  | 0.4  | 2.3 | 0.1   | 1.3  | 2.4  | 0.1  | 41.7  | Tianjin        | (Bi et al., 2019)    |
| 2017      | 7.8                           |                              | 9.3             |                              | 0.2  | 0.1 | 0.2  | 3.6  | 1.4  | 0.1  | 1.6 |       | 2.2  | 15.2 |      | 58.3  | Yantai         | (Wen et al., 2019)   |
|           | 3.2                           |                              | 9.2             | 3.0                          | 0.5  | 0.2 | 1.1  | 19.3 | 6.7  | 0.7  | 2.6 | 0.1   | 3.0  | 3.0  | 0.1  | 47    |                | SPAP, Bi et al. 2019 |
|           | 10.1                          | 0.1                          | 32.8            | 14.0                         | 0.2  | 0.1 | 0.8  | 0.9  | 1.9  | 0.3  | 0.2 | 0.01  | 0.2  | 2.1  | 0.01 | 36    |                | SPAP, Bi et al. 2019 |
|           | 0.03                          | 0.3                          | 0.1             | 0.5                          | 0.03 | 0.1 | 0.04 | 1.1  | 0.1  | 0.05 | 0.2 | 0.003 | 0.8  | 0.6  | 0.03 | 96    |                | SPAP, Bi et al. 2019 |
|           | 9.4                           | 2.1                          | 3.9             | 1.5                          | 0.9  | 0.7 | 3.2  | 33.4 | 0.1  | 0.1  | 2.7 | 0.1   | 4.2  | 0.8  | 0.04 | 37    |                | SPAP, Bi et al. 2019 |
|           | 30.7                          | 3.8                          | 1.1             | 15.4                         | 0.8  | 0.4 | 1.6  | 3.4  | 27.2 | 4.3  | 3.0 | 0.1   | 9.7  | 3.8  | 0.3  |       |                | SPAP, Bi et al. 2019 |
|           | 26.4                          | 3.7                          | 1.0             | 13.6                         | 1.4  | 0.6 | 3.1  | 6.4  | 23.2 | 3.5  | 3.6 | 0.1   | 15.7 | 12.1 | 0.4  |       |                | SPAP, Bi et al. 2019 |
|           | 0.5                           | 0.1                          | 0.04            | 2.4                          |      | 0.3 | 0.3  | 1.7  | 1.1  | 1.4  | 2.9 | 0.04  | 4.8  | 4.8  | 0.3  | 79    |                | SPAP, Bi et al. 2019 |
|           | 0.3                           | 0.02                         | 0.1             | 0.05                         |      | 0.6 | 0.5  | 3.2  | 1.9  | 4.0  | 3.5 | 0.03  | 8.0  | 11.3 | 0.5  | 66    |                | SPAP, Bi et al. 2019 |
|           | 0.8                           | 0.1                          | 0.4             | 0.03                         |      | 0.5 | 0.4  | 4.8  | 2.1  | 3.8  | 3.8 | 0.1   | 6.9  | 6.2  | 0.4  | 70    |                | SPAP, Bi et al. 2019 |
|           | 1.7                           | 0.1                          | 1.5             | 0.1                          | 0.1  | 0.9 | 0.8  | 6.8  | 1.9  | 3.4  | 5.8 | 0.2   | 13.8 | 11.9 | 0.7  | 50    |                | SPAP, Bi et al. 2019 |
|           | 0.9                           | 0.04                         | 0.3             | 0.03                         | 0.2  | 1.1 | 1.0  | 8.0  | 2.6  | 3.3  | 7.6 | 0.2   | 14.9 | 10.1 | 0.7  | 49    |                | SPAP, Bi et al. 2019 |
|           |                               |                              | 0.03            | 0.2                          | 0.4  | 0.6 | 0.5  | 5.3  | 7.9  | 5.1  | 2.2 | 0.03  | 7.1  | 20.3 | 0.3  | 50    |                | SPAP, Bi et al. 2019 |
|           | 2.7                           | 0.3                          | 0.4             | 0.7                          | 0.6  | 0.6 | 0.6  | 5.0  | 6.1  | 10.5 | 2.9 | 0.03  | 5.1  | 14.2 | 0.3  | 50    |                | SPAP, Bi et al. 2019 |
|           |                               |                              | 0.03            | 0.1                          | 0.7  | 0.6 | 0.9  | 12.3 | 5.5  | 8.5  | 2.6 | 0.04  | 6.5  | 13.6 | 0.3  | 48    |                | SPAP, Bi et al. 2019 |

|      |      |     |      |     |     |     |     |      |      |      |     |      |      |      |      |      |                      |       |
|------|------|-----|------|-----|-----|-----|-----|------|------|------|-----|------|------|------|------|------|----------------------|-------|
|      | 1.8  | 0.3 | 0.2  | 0.2 | 0.3 | 0.4 | 0.4 | 3.4  | 2.0  | 5.8  | 2.6 | 0.04 | 7.3  | 20.0 | 0.4  | 55   | SPAP, Bi et al. 2019 |       |
|      | 0.1  |     | 0.0  | 0.2 | 0.4 | 0.4 | 0.4 | 3.6  | 2.6  | 3.6  | 2.2 | 0.03 | 6.3  | 20.0 | 0.3  | 60   | SPAP, Bi et al. 2019 |       |
| 1987 | 10.2 |     | 0.1  | 0.3 |     | 0.5 |     | 3.5  |      | 4.3  | 2.9 | 0.03 | 6    | 9.0  | 0.4  | 62.9 | Colorado             | 3190  |
| 1987 | 2.1  |     | 0.1  | 0.3 |     | 0.5 |     | 2.6  | 4.4  | 6.7  | 2.7 | 0.03 | 6.4  | 9.1  | 0.4  | 64.7 | Colorado             | 3191  |
| 1987 | 18.2 | 0.1 | 0.1  | 0.4 |     | 0.4 |     | 4.3  | 1.9  | 1.9  | 3.1 | 0.02 | 5.5  | 8.9  | 0.5  | 54.6 | Colorado             | 3192  |
| 1987 | 2.4  |     | 0.1  | 0.3 |     | 0.8 |     | 7.2  | 2.9  | 1.2  | 4.7 | 0.06 | 9    | 12.0 | 0.5  | 58.9 | Colorado             | 3194  |
| 1995 | 27.3 | 0.2 | 0.2  | 2.0 | 2.1 | 0.8 | 2.4 | 3.8  | 3.2  | 2.2  | 3.3 | 0.12 | 4.2  | 7.8  | 0.2  | 40.1 | Colorado             | 3687  |
| 1995 | 15.4 | 0.4 | 1.7  | 0.2 | 0.3 | 0.1 | 0.3 | 10.0 | 1.9  | 2.5  | 0.7 | 0.01 | 1.3  | 2.3  | 0.01 | 62.9 | Colorado             | 3691  |
| 1995 | 7.7  | 0.2 | 1.6  | 6.6 | 0.1 | 0.4 | 0.5 | 2.3  | 11.7 | 1.7  | 1.9 | 0.01 | 5.4  | 9.0  | 0.4  | 50.5 | Colorado             | 3700  |
| 1997 | 1.5  |     | 0.3  |     | 0.6 | 2.0 | 1.9 | 4.0  | 8.7  | 0.4  | 1.9 | 0.03 | 19.7 | 23.9 |      | 35.2 | South Africa         | 3987  |
| 1999 | 10.2 | 1.6 | 3.8  | 0.3 | 3.8 | 0.6 | 1.2 | 4.3  | 70.3 | 0.01 | 0.8 | 0.03 | 1.2  | 1.9  | 0.1  | 0.03 | Texas                | 4290  |
| 1999 | 71.1 |     | 0.2  | 5.5 | 0.1 | 0.3 |     | 5.4  | 1.0  | 0.2  | 2.3 | 0.08 | 2.8  | 8.5  | 0.5  | 2.2  | Texas                | 4307  |
| 1999 | 41.5 | 0.1 |      | 0.8 | 0.2 | 0.6 |     | 24.8 | 3.6  | 0.9  | 4.4 | 0.3  | 2.1  | 12.5 | 1.4  | 6.7  | Texas                | 4310  |
| 1999 | 4.3  | 1.3 |      | 0.1 | 0.2 | 0.1 | 1.7 | 21.8 | 0.7  |      | 3.7 | 0.1  | 7.4  | 7.6  | 1.0  | 50.0 | Texas                | 4315  |
| 2002 | 5.7  | 1.0 | 0.3  | 0.5 | 0.4 | 0.2 | 1.3 | 16.1 | 55.7 | 2.4  | 2.9 | 0.03 | 5.6  | 6.1  | 0.6  | 1.2  | Texas                | 4368  |
| 2002 | 46.2 | 0.1 | 1.1  | 5.1 | 0.1 | 0.5 | 0.1 | 11.1 | 10.3 | 0.1  | 3.7 | 0.2  | 6.5  | 13.9 | 0.8  | 0.2  | Texas                | 4371  |
| 2002 | 6.4  | 0.7 | 0.0  | 0.1 | 0.2 | 0.3 | 1.5 | 18.8 | 1.5  | 1.4  | 3.5 | 0.1  | 6.8  | 9.1  | 1.0  | 48.6 | Texas                | 4317  |
| 2006 | 12.7 | 0.2 | 0.07 | 0.4 | 0.1 | 0.4 | 0.5 | 3.7  | 2.6  | 1.9  | 2.7 | 0.02 | 5.4  | 8.9  | 0.4  | 60.0 |                      | 91041 |
| 2010 | 0.4  |     |      |     | 3.9 | 0.3 | 0.0 | 8.5  |      |      | 2.0 |      | 9.5  | 11.2 | 0.6  | 63.7 | Canada               | 95518 |

Note:

1. The values under different components are the weight percentage in PM<sub>2.5</sub>, %; the number under data source represents the code number in speciate\_5.0\_0;
2. SPAP: Database of Source Profiles of Air Pollution (SPAP, <http://www.nkspap.com:9091/>), measured by State Environmental Protection Key Laboratory of Urban Ambient Air Particulate Matter Pollution Prevention and Control & Tianjin Key Laboratory of Urban, Nankai University. SPAP data used in this table were deposited

to the Mendeley data repository and can be freely downloaded from <https://doi.org/10.17632/x8dfshjt9j.2>, Bi et al., 2019.

Table S4 Industrial process (Sintering) source profiles from published literatures in China, SPAP and SPECIATE database

| Year      | SO <sub>4</sub> <sup>2-</sup> | NO <sub>3</sub> <sup>-</sup> | Cl <sup>-</sup> | NH <sub>4</sub> <sup>+</sup> | Na     | K    | Mg  | Ca | OC  | EC  | Fe   | Mn   | Al   | Si   | Ti    | Other | City/Region | Data source          |
|-----------|-------------------------------|------------------------------|-----------------|------------------------------|--------|------|-----|----|-----|-----|------|------|------|------|-------|-------|-------------|----------------------|
| 2006      | 23                            |                              | 20.0            | 1.7                          | 2.2    | 17.2 | 0.2 | 13 | 13  |     | 1.2  | 0.0  |      |      |       | 9.0   | Shanghai    | (Zheng et al., 2013) |
| 2007      | 22                            | 0.1                          | 8.4             | 0.6                          | 3.1    | 22.6 | 1.1 | 7  | 11  | 2.6 | 4.8  | 0.1  | 3.8  | 6.8  | 0.3   | 5.6   |             | (Ma, 2009)           |
| 2007      | 6                             | 0.1                          | 7.1             | 0.1                          | 4.3    | 3.2  | 3   | 15 | 9   | 3.3 | 30.1 | 0.7  | 5.9  | 9.2  | 0.4   | 2.4   |             |                      |
| 2012~2013 | 3                             | 0.0                          | 3.1             | 0.2                          | 1.6    | 25.8 | 0.2 | 2  | 13  | 5.2 | 6.2  | 0.1  | 0.6  | 6.8  |       | 32.6  |             | (Zhao, 2014)         |
| 2012~2013 | 7                             | 0.2                          | 6.6             | 0.1                          | 0.4    | 7    | 0.5 | 5  | 10  | 3.4 | 25.3 | 0.2  | 2.9  | 9.2  |       | 22.7  |             |                      |
| 2012~2014 |                               |                              |                 |                              | 1.9    | 1.2  | 1.3 | 4  | 2   |     | 37.2 | 0.1  | 7.1  | 20.3 | 0.8   | 24.7  | Guiyang     | (Wang et al., 2016)  |
| 2015      | 13                            | 0.5                          | 23.2            | 8.9                          | 2      | 13.9 | 0.1 | 17 | 6   | 0.3 | 2.7  |      | 0.1  | 0.1  |       | 12.7  | Jing-Jin-Ji | (Guo et al., 2017)   |
| 2017      | 2                             | 9                            | 4               | 2                            | 1      | 1    | 3   | 33 | 4   | 0.3 | 3    | 0.1  | 4    | 1    | 0.04  | 34    |             | SPAP                 |
| 2017      | 0.03                          | 6                            | 7               | 6                            | 1      | 5    | 0.2 | 1  |     |     | 1    | 0.02 | 0.01 | 1    | 0.01  | 71    |             | SPAP                 |
| 2017      | 1                             | 0.4                          | 9               | 2                            | 0.3    | 3    | 0.5 | 14 | 0.3 | 3   | 7    | 0.04 | 0.2  | 2    | 0.004 | 58    |             | SPAP                 |
| 2018      | 2                             | 0.1                          | 1               | 0.3                          | 0.0004 | 1    | 0.4 | 13 |     |     | 35   | 1    | 1    | 5    |       | 41    |             | SPAP                 |
| 1988      |                               |                              | 0.3             |                              |        | 0.3  |     | 13 |     |     | 27.5 | 0.7  | 2.6  | 6.4  | 0.3   | 49.2  |             | 283042.5             |
| 1989      | 20                            |                              | 17.0            |                              |        | 20.0 |     | 1  |     |     | 13.0 | 0.6  |      |      |       | 28.8  |             | 283012.5             |
| 2009      | 10                            |                              | 17.0            |                              | 13.0   | 21.0 | 0.2 | 1  | 3   | 0.2 | 6.9  | 0.3  | 0.1  | 1.2  |       | 26.8  |             | 91139                |

Note:

1. The values under different components are the weight percentage in PM<sub>2.5</sub>, %; the number under data source represents the code number in speciate\_5.0\_0
2. SPAP: Database of Source Profiles of Air Pollution (SPAP, <http://www.nkspap.com:9091/>), measured by State Environmental Protection Key Laboratory of Urban Ambient Air Particulate Matter Pollution Prevention and Control & Tianjin Key Laboratory of Urban, Nankai University.

Table S5 Industrial process (Iron-making) source profiles from published literatures in China, SPAP and SPECIATE database

| Year | SO <sub>4</sub> <sup>2-</sup> | NO <sub>3</sub> <sup>-</sup> | Cl <sup>-</sup> | NH <sub>4</sub> <sup>+</sup> | Na | K | Mg | Ca | OC | EC | Fe | Mn | Al | Si | Ti | Other | City/Region | Data source |
|------|-------------------------------|------------------------------|-----------------|------------------------------|----|---|----|----|----|----|----|----|----|----|----|-------|-------------|-------------|
|------|-------------------------------|------------------------------|-----------------|------------------------------|----|---|----|----|----|----|----|----|----|----|----|-------|-------------|-------------|

|           |     |      |     |     |     |      |     |     |     |     |      |      |     |     |      |      |             |                     |
|-----------|-----|------|-----|-----|-----|------|-----|-----|-----|-----|------|------|-----|-----|------|------|-------------|---------------------|
| 2007      | 12  | 2.6  | 6.6 | 1.1 | 4   | 4.4  | 2.9 | 6.5 | 12  | 0.8 | 14   | 0.4  | 10  | 17  | 0.7  | 5.5  |             | (Ma, 2009)          |
| 2012~2013 | 29  | 1.3  | 1.5 |     | 2.8 | 12.2 | 0.8 | 4   | 5   | 1.3 | 32   | 0.3  | 1.2 | 2   |      | 7.6  |             | (Zhao, 2014)        |
| 2014~2015 | 11  | 4.8  |     | 5.5 | 1.3 | 1.7  | 3.6 | 7.7 | 16  | 7   | 9    | 0.1  | 3.5 | 4   | 1.4  | 23.6 |             | (Liu et al., 2017b) |
| 2015      | 7   | 0.5  | 1.6 | 2.3 | 0.9 | 3.2  | 0.2 | 2.5 | 4   | 4.2 | 63   | 0.8  | 0.3 | 1   | 0.2  | 8.3  | Jing-Jin-Ji | (Guo et al., 2017)  |
| 2018      | 2   |      | 0.4 | 1.7 |     |      |     | 8.7 | 6   | 0.8 | 25   |      |     |     |      | 49.5 | Wuhan       | (Wen et al., 2018)  |
|           | 6.1 | 1.6  | 5.2 | 2.7 | 1.7 | 3.3  | 1.3 | 7.7 | 8.2 | 7.8 | 12.8 | 0.3  | 2.0 | 2.7 | 0.2  | 37   |             | SPAP                |
| 2017      | 2   | 0.02 | 0.2 | 1   | 0.2 | 1    | 0.1 | 6   | 6   | 3   | 17   | 0.1  | 1   | 1   | 0.02 | 62   |             | SPAP                |
| 1989      |     |      | 2.5 |     | 2.0 | 3.2  |     | 2   |     |     | 6    | 1.70 | 1.3 | 2   | 0.5  | 79.5 |             | 282012.5            |
| 1989      |     |      | 0.9 |     | 1.3 | 3.0  |     | 1.0 |     |     | 15   | 4.50 | 1.1 | 24  | 0.1  | 49.1 |             | 282022.5            |
| 1989      |     |      | 1.7 |     | 1.7 | 3.1  |     | 1.3 |     |     | 10   | 3.1  | 1.2 | 13  | 0.3  | 64.2 |             | 900102.5            |
| 2006      | 2   | 0.2  |     |     | 1.3 | 1.9  | 3.1 | 6.2 | 3   | 0.4 | 32   | 3.60 | 0.7 | 3   | 0.2  | 42.0 |             | 91011               |
| 2009      | 6   | 0.5  | 0.8 |     | 1.2 | 2.7  |     | 0.9 | 6   | 0.9 | 14   | 4.10 | 1.0 | 22  | 0.1  | 39.1 |             | 91157               |

Note:

1. The values under different components are the weight percentage in PM<sub>2.5</sub>, %; the number under data source represents the code number in speciate\_5.0\_0
2. SPAP: Database of Source Profiles of Air Pollution (SPAP, <http://www.nkspap.com:9091/>), measured by State Environmental Protection Key Laboratory of Urban Ambient Air Particulate Matter Pollution Prevention and Control & Tianjin Key Laboratory of Urban, Nankai University.

Table S6 Industrial process (Steelmaking) source profiles from published literatures in China, SPAP and SPECIATE database

| Year      | SO <sub>4</sub> <sup>2-</sup> | NO <sub>3</sub> <sup>-</sup> | Cl <sup>-</sup> | NH <sub>4</sub> <sup>+</sup> | Na  | K    | Mg  | Ca   | OC  | EC  | Fe   | Mn  | Al  | Si   | Ti   | Other | City/Region | Data source        |
|-----------|-------------------------------|------------------------------|-----------------|------------------------------|-----|------|-----|------|-----|-----|------|-----|-----|------|------|-------|-------------|--------------------|
| 2010      | 0.9                           |                              | 1.1             |                              | 1   | 1.3  | 3.5 | 8.7  | 4.2 | 1.6 | 16.6 | 0.1 | 5.3 | 8.9  | 0.3  | 46.5  | Jincheng    | (Cui, 2011)        |
| 2012~2013 | 14.1                          | 0.5                          | 2.2             | 0                            | 2.8 | 11.1 | 1.6 | 2.2  | 2.3 | 1.5 | 6.4  | 3.5 | 0.6 | 2.5  |      | 48.7  |             | (Zhao, 2014)       |
| 2012~2013 | 5.6                           | 0.2                          | 3.6             | 0                            | 0.4 | 3.6  | 0.3 | 0.9  | 4.1 | 0.1 | 57.9 | 0.9 | 0.4 | 2.9  |      | 19.1  |             |                    |
| 2015      | 0.8                           |                              | 2.3             |                              | 1.1 | 3    | 0.6 | 7.0  | 0.3 |     | 72.7 | 2.5 | 0.3 | 1.2  | 0.2  | 8     | Jing-Jin-Ji | (Guo et al., 2017) |
| 2018      | 1.4                           |                              | 0.3             | 2.0                          |     |      |     | 20.3 | 8.8 | 0.7 | 8.2  |     |     | 11.0 |      | 47.3  | Wuhan       | (Wen et al., 2018) |
| 2014      | 4                             | 1                            | 2               | 0.2                          |     |      |     |      | 12  | 41  |      | 0.1 | 0.2 | 3    | 0.08 | 36    |             | SPAP               |

|      |      |     |      |      |      |      |     |      |     |     |      |      |     |     |      |       |              |       |
|------|------|-----|------|------|------|------|-----|------|-----|-----|------|------|-----|-----|------|-------|--------------|-------|
| 2015 | 1    | 0.1 | 1    | 0.01 |      | 1    | 1   | 16   | 5   | 6   | 4    | 0.2  | 0.5 | 1   | 0.08 | 63    | SPAP         |       |
|      | 12   | 1   | 30   | 14   | 2    | 14   | 0.4 | 1    | 5   | 0.4 | 1    | 0.1  | 1   | 2   | 0.19 | 16    | SPAP         |       |
| 1989 | 40.0 | 1   |      |      |      | 5.0  |     | 0.6  |     |     | 11.0 | 0.60 |     | 9.9 |      | 32.3  | 283032.5     |       |
| 1989 | 2.5  |     | 1.9  |      | 1.3  | 0.9  | 6.5 | 6    |     |     | 32.0 | 8.70 | 0.7 | 5.0 | 0.2  | 34.1  | 283052.5     |       |
| 1989 |      |     | 0.5  |      |      | 2.5  |     | 25   |     |     | 21.0 | 0.30 | 0.9 | 1.6 | 0.2  | 48    | 283062.5     |       |
| 2004 | 0.7  |     | 30.0 |      | 13.0 | 22.0 | 0.2 | 0.6  | 2.7 | 0.2 | 0.9  | 0.0  | 0.1 | 1.2 |      | 28.39 | South Africa | 3991  |
| 2004 |      |     | 0.5  |      |      | 0.3  |     | 22.0 |     |     | 12.0 | 0.60 | 0.9 | 3.0 | 0.2  | 60.5  | Ohio         | 3547  |
| 2009 | 8.0  |     | 0.5  |      |      | 2.5  |     | 25.0 |     |     | 21.0 | 0.30 | 0.9 | 1.6 | 0.2  | 40    |              | 91179 |

Note:

1. The values under different components are the weight percentage in PM<sub>2.5</sub>, %; the number under data source represents the code number in speciate\_5.0\_0
2. SPAP: Database of Source Profiles of Air Pollution (SPAP, <http://www.nkspap.com:9091/>), measured by State Environmental Protection Key Laboratory of Urban Ambient Air Particulate Matter Pollution Prevention and Control & Tianjin Key Laboratory of Urban, Nankai University.

Table S7 Industrial process (Cement) source profiles from published literatures in China, SPAP and SPECIATE database

| Year      | SO <sub>4</sub> <sup>2-</sup> | NO <sub>3</sub> <sup>-</sup> | Cl <sup>-</sup> | NH <sub>4</sub> <sup>+</sup> | Na  | K   | Mg  | Ca   | OC  | EC  | Fe  | Mn   | Al  | Si   | Ti  | Other | City/Region | Data source          |
|-----------|-------------------------------|------------------------------|-----------------|------------------------------|-----|-----|-----|------|-----|-----|-----|------|-----|------|-----|-------|-------------|----------------------|
| 2001      | 14                            |                              |                 |                              | 1.7 | 1.4 | 0.4 | 36   | 2   | 0.3 | 1.7 | 0.0  | 1.2 | 4.8  | 0.1 | 36.4  | Hongkong    | (Ho et al., 2003)    |
| 2006      | 3                             | 0.3                          | 0.2             | 0.3                          | 0.2 | 2.7 | 0.5 | 24   | 3   | 0.7 | 3.7 | 0.1  | 5   | 6.2  | 0.4 | 49.7  | Hangzhou    | (Bao et al., 2010)   |
| 2014~2015 | 10                            | 1.8                          |                 | 2.7                          | 0.5 | 0.8 | 1.7 | 11   | 14  | 2.1 | 5.5 | 0.0  | 4.6 | 10.1 | 0.3 | 34.9  |             | (Liu et al., 2017b)  |
| 2014~2015 | 16                            | 0.7                          |                 | 0.6                          | 0.7 | 0.5 | 1.8 | 12   | 5   | 6.2 | 4.7 | 0.1  | 3.1 | 9.4  | 0.2 | 39.2  |             |                      |
|           |                               | 0.4                          | 0.2             |                              | 0.1 | 2.3 | 0.8 | 59   | 20  | 1.9 | 5.3 | 0.3  | 2   | 5.5  | 0.4 | 1.4   | Jing-Jin-Ji |                      |
|           |                               |                              | 0.2             |                              | 0.1 | 1.1 | 0.6 | 64   | 23  | 0.6 | 3.9 | 0.0  | 1.3 | 3.8  | 0.2 | 1.2   | Jing-Jin-Ji | (Ye et al., 2017)    |
|           | 0.2                           | 0.5                          | 0.4             |                              | 0.1 | 2.1 | 0.9 | 52   | 29  | 2.2 | 3.5 | 0.0  | 2.2 | 5.9  | 0.2 | 1.2   | Jing-Jin-Ji |                      |
|           |                               | 1.2                          | 0.2             |                              | 0.1 | 1.8 | 1.5 | 68   | 9   |     | 4.3 | 0.1  | 3.2 | 8.2  | 0.3 | 1.6   | Jing-Jin-Ji |                      |
| 2017      | 21                            | 0.7                          | 2.2             | 4.5                          | 1.2 | 0.8 | 1.4 | 3    | 2   | 0.5 | 3.2 | 0.1  | 5.2 | 11.4 |     | 42.8  | Wuhan       | (Gong and Luo, 2018) |
|           | 4.9                           | 0.4                          | 0.5             | 1.6                          | 1.4 | 1.1 | 1.5 | 19.1 | 4.9 | 1.9 | 2.3 | 0.1  | 3.5 | 7.0  | 0.1 | 50    |             | SPAP                 |
| 2016      | 4                             | 0.3                          | 0.1             |                              | 0.3 | 1   | 1   | 31   | 1   | 5   | 2   | 0.03 | 2   | 9    | 0.2 | 42    |             | SPAP                 |

|      |     |      |     |     |     |      |     |    |    |     |     |      |     |     |      |      |                |
|------|-----|------|-----|-----|-----|------|-----|----|----|-----|-----|------|-----|-----|------|------|----------------|
| 2016 | 1   | 2    | 1   | 2   |     | 0.4  | 0.3 | 15 | 4  | 0.2 | 2   | 0.04 | 3   | 0.3 | 0.03 | 69   | SPAP           |
| 2017 | 1   | 2    | 1   | 9   | 9   | 1    | 2   | 18 |    |     | 3   | 0.05 | 3   | 6   | 0.1  | 44   | SPAP           |
| 2017 | 0.5 | 0.02 | 0.2 | 1   | 0.3 | 0.5  | 1   | 17 | 10 | 1   | 1   | 0.03 | 1   | 2   | 0.02 | 66   | SPAP           |
| 1989 | 18  | 0.2  | 7.8 |     | 2.3 | 5.4  | 0.2 | 10 | 5  | 0.2 | 0.9 | 0.0  | 4.3 | 8.4 | 0.3  | 36.6 | 272032.5       |
| 1997 | 0   | 0.1  | 0.1 | 0.0 | 0.0 | 0.3  | 0.1 | 30 | 14 | 0.0 | 1.7 | 0.0  | 0.7 | 2.8 | 0.0  | 49.0 | Mexico<br>4087 |
| 1999 | 38  | 4.6  | 3.9 | 1.2 | 2.4 | 21.8 | 0.0 | 10 | 12 | 1.0 | 1.1 | 0.1  | 0.8 | 3.1 | 0.1  | 0.2  | Texas<br>4333  |
| 2002 | 31  | 8.9  | 7.1 | 2.4 | 2.3 | 11.6 | 0.1 | 18 | 13 | 3.0 | 1.3 | 0.1  | 1.1 | 4.3 | 0.1  |      | Texas<br>4378  |
| 2006 | 18  | 4.7  | 3.2 | 2.4 | 2.3 | 7.0  | 0.1 | 17 | 13 | 3.0 | 0.7 | 0.1  | 1.1 | 4.3 | 0.3  | 23.5 | 91004          |
| 2009 | 18  | 4.7  | 3.1 | 2.3 | 2.3 | 6.9  | 0.1 | 17 | 13 | 2.9 | 0.7 | 0.1  | 1.1 | 4.2 | 0.3  | 24.4 | 91127          |

Note:

1. The values under different components are the weight percentage in PM<sub>2.5</sub>, %; the number under data source represents the code number in speciate\_5.0\_0
2. SPAP: Database of Source Profiles of Air Pollution (SPAP, <http://www.nkspap.com:9091/>), measured by State Environmental Protection Key Laboratory of Urban Ambient Air Particulate Matter Pollution Prevention and Control & Tianjin Key Laboratory of Urban, Nankai University.

Table S8 Transportation sector (Heavy duty gasoline) source profiles from published literatures in China, SPAP and SPECIATE database

| Year      | SO <sub>4</sub> <sup>2-</sup> | NO <sub>3</sub> <sup>-</sup> | Cl <sup>-</sup> | NH <sub>4</sub> <sup>+</sup> | Na   | K   | Mg  | Ca   | OC   | EC   | Fe  | Mn   | Al  | Si  | Ti    | Other | City/Region       | Data source          |
|-----------|-------------------------------|------------------------------|-----------------|------------------------------|------|-----|-----|------|------|------|-----|------|-----|-----|-------|-------|-------------------|----------------------|
| 2005~2006 | 1                             |                              |                 |                              | 0.8  | 0.3 | 0.3 | 2.4  | 60   | 24   | 0.4 |      | 0.2 | 1   | 0.1   | 9.7   | Tianjin           | (Zhang, 2007)        |
| 2009      | 2                             | 0.2                          |                 | 0.6                          | 0.35 |     |     | 0.71 | 40   | 22   |     |      | 1   | 3.1 |       | 30.0  | Dongying          | (Kong, 2012)         |
| 2012      | 6                             | 1.4                          | 1.1             | 1.8                          | 2    | 0.9 | 0.9 | 1.5  | 52   | 24   | 1   |      | 0.2 | 0.3 |       | 7.6   | Pearl River Delta | (Feng, 2013)         |
| 2012      | 1                             | 0.7                          | 0.5             | 0.1                          | 0.7  | 0.3 | 0.1 | 0.9  | 29   | 61   | 0.6 |      |     |     |       | 4.7   | Hubei             | (Zhang et al., 2015) |
| 2012      | 1                             | 0.6                          | 0.6             | 0.1                          | 0.6  | 0.3 | 0.1 | 0.6  | 32   | 59   | 0.7 |      |     |     |       | 4.0   | Hubei             |                      |
| 2014~2015 | 9                             | 1.9                          | 0.3             | 2.9                          | 0.6  | 0.5 | 0.2 | 0.8  | 19   | 43   | 0.3 |      | 0.1 |     |       | 21.3  | Hengshui          |                      |
| 2014~2015 | 9                             | 2.7                          | 0.6             | 2.2                          | 0.7  | 0.6 | 0.2 | 0.6  | 16   | 40   | 0.4 |      | 0.3 |     |       | 26.9  | Hengshui          | (Wang et al., 2015)  |
| 2014~2015 | 8                             | 1.9                          | 0.4             | 4                            | 0.5  | 0.5 | 0.3 | 0.8  | 20   | 39   | 0.3 |      | 0.2 |     |       | 24.6  | Hengshui          |                      |
| 2015      |                               | 1.0                          | 0.2             |                              |      |     |     | 0.2  | 31.4 | 19.8 | 0.1 | 0.01 | 0.3 | 0.8 | 0.002 | 46.2  |                   | SPAP                 |

|      |    |      |     |     |     |     |     |     |      |      |     |      |     |     |       |      |             |          |
|------|----|------|-----|-----|-----|-----|-----|-----|------|------|-----|------|-----|-----|-------|------|-------------|----------|
| 2015 |    | 1.0  | 1.0 |     |     |     |     | 0.2 | 41.6 | 24.4 | 0.1 | 0.01 | 0.4 |     | 0.001 | 31.3 |             | SPAP     |
| 1989 | 5  |      |     |     | 0.8 | 0.2 | 0.9 | 0.7 | 21   | 55   | 0.6 | 0.0  | 1.0 | 1.6 | 0.0   | 13.3 | -           | 322022.5 |
| 1989 |    |      | 0.0 |     |     | 0.0 |     | 0.1 | 36   | 52   |     |      | 0.0 | 0.0 | 0.0   | 11.9 | -           | 322032.5 |
| 1990 |    |      | 0.0 |     |     |     |     | 0.1 | 36   | 52   |     |      | 0.0 | 0.0 | 0.0   | 11.9 | -           | 322072.5 |
| 1999 | 0  | 0.3  | 0.3 | 0.1 | 0.2 | 0.1 |     | 0.2 | 33   | 41   | 0.1 | 0.0  | 0.1 | 0.6 | 0.0   | 23.9 | Los Angeles | 322082.5 |
| 2000 | 30 | 0.8  | 1.4 | 5.1 |     | 0.0 |     | 3   | 16   | 33   | 0.1 | 0.01 |     | 0.6 | 0.2   | 10.0 | Ottawa      | 4750     |
| 2000 | 1  | 0.1  | 0.1 | 0.1 |     |     |     | 0   | 44   | 46   |     | 0.06 | 0.1 | 0.5 |       | 8.0  | Ottawa      | 4749     |
| 2001 | 1  |      | 0.0 | 0.2 | 0.1 | 0.0 | 0.0 | 0   | 25   | 63   | 0.1 |      | 0.0 | 0.5 |       | 10.4 | California  | 4860     |
| 2005 | 3  | 0.2  | 0.0 | 1.0 |     | 0.0 | 0.0 | 0   | 15   | 70   | 0.1 | 0.00 |     | 0.2 |       | 10.1 | Los Angeles | 4972     |
| 2005 | 2  | 0.3  | 0.1 | 0.4 | 0.0 | 0.0 | 0.0 | 1.2 | 62   | 30   | 0.3 | 0.0  | 0.0 | 0.0 |       | 3.3  | Los Angeles | 4978     |
| 2008 | 40 |      |     |     | 0.9 | 0.0 | 0.1 | 0.4 | 49   | 7    | 0.4 | 0.01 | 0.1 | 0.1 | 0.0   | 2.4  |             | 5679     |
| 2012 | 1  | 15.9 |     | 1.2 | 0.1 | 0.0 |     | 0.4 | 52   | 14   | 0.2 | 0.01 | 0.1 | 0.1 | 0.0   | 15.2 |             | 95334    |

Note:

1. The values under different components are the weight percentage in PM<sub>2.5</sub>, %; the number under data source represents the code number in speciate\_5.0\_0
2. SPAP: Database of Source Profiles of Air Pollution (SPAP, <http://www.nkspap.com:9091/>), measured by State Environmental Protection Key Laboratory of Urban Ambient Air Particulate Matter Pollution Prevention and Control & Tianjin Key Laboratory of Urban, Nankai University.

Table S9 Transportation sector (Light diesel) source profiles from published literatures in China, SPAP and SPECIATE database

| Year      | SO <sub>4</sub> <sup>2-</sup> | NO <sub>3</sub> <sup>-</sup> | Cl <sup>-</sup> | NH <sub>4</sub> <sup>+</sup> | Na  | K    | Mg  | Ca  | OC   | EC   | Fe  | Mn   | Al  | Si  | Ti  | Other | City/Region    | Data source        |
|-----------|-------------------------------|------------------------------|-----------------|------------------------------|-----|------|-----|-----|------|------|-----|------|-----|-----|-----|-------|----------------|--------------------|
| 2002      | 5.9                           | 1.0                          | 0.2             | 0.5                          | 0.0 | 0.0  | 0.0 | 0.0 | 10   | 21   | 0.2 | 0.0  | 0.0 | 0.0 | 0.0 |       | Yantai         | (Cui et al., 2017) |
| 2009      | 15                            | 1.2                          |                 | 1.8                          | 0.9 |      |     |     | 38   | 6    |     |      | 1.0 | 2.5 |     |       | Dongying       | (Kong, 2012)       |
| 2009~2015 | 0.1                           | 1.9                          | 0.3             | 0.2                          | 0.3 | 0.0  | 0.0 | 0.2 | 36   | 24   | 0.1 | 0.0  | 0.2 | 0.6 | 0.0 |       | Fen-Wei plains | (Hao et al., 2019) |
| 2013~2014 | 1.1                           | 0.1                          | 0.3             | 0.0                          |     | 0.1  |     | 0.1 | 16   | 24   | 1.2 | 0.0  | 0.7 | 0.6 | 0.2 |       | -              | (Liu et al., 2018) |
| 2015      | 0.3                           | 3.3                          | 0.2             |                              | 0.0 | 0.00 | 0.1 | 0.4 | 32   | 19   | 0.3 |      | 0.2 | 0.7 | 0.4 | 44    |                | SPAP               |
|           | 3.0                           | 2.3                          | 0.8             | 1.5                          | 0.4 | 0.1  | 0.4 | 0.5 | 34.6 | 19.2 | 0.2 | 0.04 | 0.3 | 0.8 | 0.1 | 36    |                | SPAP               |

|      |     |     |     |     |     |     |     |     |    |    |     |     |     |     |     |            |      |
|------|-----|-----|-----|-----|-----|-----|-----|-----|----|----|-----|-----|-----|-----|-----|------------|------|
| 1987 | 3.2 |     | 0.1 | 0.6 | 0.1 |     |     | 0.1 | 49 | 43 | 0.0 |     | 0.3 | 0.0 |     | California | 3463 |
| 1988 | 1.4 | 0.1 | 0.1 | 0.3 |     | 0.0 |     | 0.2 | 18 | 78 | 0.6 |     | 0.4 |     |     | Denver     | 3219 |
| 1989 | 2.4 | 0.3 | 1.6 | 0.9 |     | 0.0 |     | 0.2 | 40 | 33 | 0.2 | 0.0 | 0.2 | 0.5 |     | Phoenix    | 3518 |
| 1996 | 0.4 | 0.2 | 0.0 |     | 0.0 | 0.0 | 0.0 | 0.1 | 42 | 48 | 0.1 |     | 0.0 | 0.4 |     | Colorado   | 3960 |
| 1997 | 0.4 | 0.2 | 0.1 |     | 0.1 |     | 0.1 | 0.1 | 19 | 75 | 0.0 |     | 0.0 | 0.5 |     | Colorado   | 3878 |
| 1998 | 3.2 | 2.8 | 0.6 | 1.4 | 0.4 | 0.8 |     | 0.4 | 52 | 37 | 0.3 | 0.0 | 0.5 | 0.8 | 0.0 | Mexico     | 4014 |
| 2001 | 1.9 |     | 0.2 | 0.5 | 0.0 | 0.0 | 0.2 | 0.3 | 37 | 43 | 0.2 |     | 0.1 |     |     | California | 4842 |
| 2007 | 5.3 | 1.3 | 0.4 | 1.7 | 0.3 | 0.3 | 0.1 | 0.6 | 35 | 46 | 0.3 |     | 0.1 | 0.3 | 0.0 |            | 8994 |

Note:

1. The values under different components are the weight percentage in PM<sub>2.5</sub>, %; the number under data source represents the code number in speciate\_5.0\_0
2. SPAP: Database of Source Profiles of Air Pollution (SPAP, <http://www.nkspap.com:9091/>), measured by State Environmental Protection Key Laboratory of Urban Ambient Air Particulate Matter Pollution Prevention and Control & Tianjin Key Laboratory of Urban, Nankai University.

Table S10 Transportation sector (Light duty gasoline) source profiles from published literatures in China, SPAP and SPECIATE database

| Year      | SO <sub>4</sub> <sup>2-</sup> | NO <sub>3</sub> <sup>-</sup> | Cl <sup>-</sup> | NH <sub>4</sub> <sup>+</sup> | Na     | K     | Mg   | Ca  | OC | EC | Fe  | Mn  | Al  | Si  | Ti    | Other | City/Region    | Data source          |
|-----------|-------------------------------|------------------------------|-----------------|------------------------------|--------|-------|------|-----|----|----|-----|-----|-----|-----|-------|-------|----------------|----------------------|
| 2009~2015 | 0.1                           | 2.0                          | 0.3             |                              | 0.3    | 0.0   | 0.1  | 0.4 | 48 | 6  | 0.5 | 0.5 | 0.4 | 0.4 |       | 41.0  | Fen-Wei plains | (Hao et al., 2019)   |
| 2010      | 3.9                           | 1.8                          | 0.8             |                              | 1.1    | 0.2   | 0.7  | 7.8 | 39 | 29 | 2.9 | 0.1 | 4.3 | 4.2 | 0.1   | 4.2   | Xining         | (Kong, 2012)         |
| 2010      | 9.7                           | 1.7                          | 2.4             |                              | 2.3    | 1.2   | 2.8  | 6.6 | 29 | 18 | 1.6 | 0.4 | 8.6 | 4.9 | 0.2   | 10.8  | Xining         |                      |
| 2013      |                               | 1.5                          | 5.4             |                              | 3.3    | 0.1   | 0.4  | 2.5 | 54 | 21 | 0.6 | 0.1 | 0.5 |     |       | 10.7  | Xiamen         | (Zhang et al., 2016) |
| 2017      | 5                             | 6                            | 4               | 2                            | 1      | 1     | 0.2  | 1   | 33 | 34 | 0.4 | 1   | 1   |     | 0.02  | 14    |                | SPAP                 |
| 2017      | 2                             | 5                            | 5               | 5                            | 0.5    | 0.3   | 0.4  | 0.4 | 25 | 38 | 0.5 | 0.5 | 1   |     | 0.02  | 16    |                | SPAP                 |
|           | 1                             | 3                            | 1               | 4                            | 0.2    | 0.1   | 0.2  | 1   | 54 | 12 | 0.5 | 0.5 | 0.5 | 0.4 | 0.01  | 23    |                | SPAP                 |
| 2015      | 0.03                          | 2                            | 0.2             |                              | 0.0002 | 0.002 | 0.01 | 0.3 | 69 | 1  | 0.1 | 0.2 | 0.2 | 0.2 | 0.002 | 26    |                | SPAP                 |
| 2015      | 0.1                           | 2                            | 0.2             |                              | 0.02   | 0.004 | 0.01 | 0.2 | 77 | 2  | 0.1 | 0.2 | 0.2 | 0.2 | 0.003 | 18    |                | SPAP                 |
| 1989      | 17                            |                              | 1.8             |                              |        | 0.01  |      | 0.1 | 24 | 6  | 0.1 | 0.0 | 0.1 | 0.2 |       | 50.8  | -              | 312302.5             |



|      |     |     |     |     |     |      |     |     |    |    |     |     |     |     |     |      |            |          |
|------|-----|-----|-----|-----|-----|------|-----|-----|----|----|-----|-----|-----|-----|-----|------|------------|----------|
| 1990 |     |     | 0.3 |     |     | 0.05 |     | 0.1 | 31 | 15 | 0.1 | 1.0 | 0.6 | 0.8 | 0.0 | 51.1 | -          | 311062.5 |
| 1999 | 3.6 | 1.8 | 2.5 |     | 1.5 |      |     |     | 50 | 23 | 0.2 |     | 0.1 | 0.0 | 0.0 | 17.3 | -          | 311072.5 |
| 1999 | 0.5 | 0.6 | 0.9 |     | 0.5 | 0.1  |     |     | 66 | 8  | 0.8 | 0.9 | 0.7 | 0.4 | 0.0 | 20.7 | -          | 311082.5 |
| 2001 | 9.9 | 1.1 | 1.3 | 5.1 | 0.1 | 0.0  | 0.2 | 0.1 | 48 | 14 | 0.3 | 0.0 | 0.1 | 3.1 | 0.0 | 16.8 | California | 4895     |
| 2004 | 1.1 | 0.0 |     |     | 0.8 | 0.0  | 0.1 | 2.1 | 73 | 18 | 0.1 | 0.0 | 0.0 | 0.6 | 0.0 | 4.1  | Kansas     | 5570     |
| 2005 | 7.4 | 0.1 |     |     | 0.1 | 0.0  | 0.0 | 0.2 | 66 | 12 |     | 0.0 | 0.1 | 0.3 | 0.0 | 13.8 | Kansas     | 5592     |
| 2010 | 7.2 | 0.3 | 0.1 | 2.8 |     | 0.1  | 0.1 | 1.4 | 56 | 14 | 1.8 | 0.0 | 0.3 | 0.3 | 0.0 | 15.6 |            | 8993     |

Note:

1. The values under different components are the weight percentage in PM<sub>2.5</sub>, %; the number under data source represents the code number in speciate\_5.0\_0
2. SPAP: Database of Source Profiles of Air Pollution (SPAP, <http://www.nkspap.com:9091/>), measured by State Environmental Protection Key Laboratory of Urban Ambient Air Particulate Matter Pollution Prevention and Control & Tianjin Key Laboratory of Urban, Nankai University.

Table S11 Residential coal combustion source profiles from published literatures in China, SPAP and SPECIATE database

| Year      | SO <sub>4</sub> <sup>2-</sup> | NO <sub>3</sub> <sup>-</sup> | Cl <sup>-</sup> | NH <sub>4</sub> <sup>+</sup> | Na  | K    | Mg   | Ca  | OC   | EC  | Fe  | Mn   | Al   | Si   | Ti  | Other | City/Region | Data source         |
|-----------|-------------------------------|------------------------------|-----------------|------------------------------|-----|------|------|-----|------|-----|-----|------|------|------|-----|-------|-------------|---------------------|
| 2004      |                               |                              | 10.5            |                              | 1.3 | 17.4 |      | 0.1 | 3    |     | 0.1 |      | 0.1  | 0.3  |     | 67.2  | Yangquan    | (Ge et al., 2004)   |
| 2004      |                               |                              |                 |                              |     | 1.2  | 0.3  | 0.6 | 12   | 4   | 0.8 |      | 1.5  | 3.4  | 0.1 | 76.4  | Yangquan    |                     |
| 2009      | 31                            | 0.8                          | 5.6             | 0.5                          | 2   | 10.4 | 0.1  | 0.3 | 36   |     | 0.4 |      | 0.2  |      |     | 12.4  | Dongying    | (Kong, 2012)        |
| 2009      | 8                             | 0.6                          | 0.7             |                              | 1.8 | 1.3  | 0.9  | 2.4 | 69   | 6   | 2.1 | 0.1  | 1.9  |      |     | 5.6   | Dongying    |                     |
| 2012~2014 |                               |                              |                 |                              | 0.8 | 1.5  | 1.1  | 1.0 | 18   | 8   | 7.8 |      | 11.3 | 25.4 | 2.2 | 23.3  | Guiyang     | (Wang et al., 2016) |
| 2016~2017 | 17                            | 0.4                          | 1.9             | 2.1                          | 0.8 | 0.4  |      |     | 49   |     |     |      |      |      |     | 28.0  | Xian        | (Dai et al., 2019)  |
| 2016~2017 | 29                            | 1.1                          | 1.1             | 9.9                          | 1.8 | 0.1  | 0.2  |     | 32   | 5   |     |      | 0.1  |      |     | 19.5  | Xian        |                     |
| 2017~2018 | 40                            | 0.3                          | 0.9             | 18                           | 1.6 | 0.8  | 0.02 | 0.6 | 3    | 0.4 | 0.1 |      | 0.2  | 0.4  |     | 33.7  |             | SPAP                |
| 2017      | 28                            | 1.2                          | 2               | 16                           | 4.1 | 0.5  | 0.2  | 2.2 | 10   | 0.9 | 0.3 |      | 1.7  | 4.8  |     | 28.1  |             | SPAP                |
| 2017      | 31                            | 0.4                          | 20.1            | 20                           | 1.5 | 1    | 0.1  | 0.8 | 3    | 0.3 | 0.2 |      | 0.1  | 0.4  |     | 21.1  |             | SPAP                |
|           | 21.7                          | 0.5                          | 2.1             | 6.0                          | 2.2 | 1.8  | 0.2  | 0.9 | 23.3 | 5.8 | 0.8 | 0.02 | 1.5  | 2.1  | 0.2 | 30.9  |             | SPAP                |

|      |   |     |     |     |     |     |     |    |    |     |     |     |      |              |       |
|------|---|-----|-----|-----|-----|-----|-----|----|----|-----|-----|-----|------|--------------|-------|
| 1995 | 7 | 0.8 | 0.3 | 3.1 | 1.7 | 0.1 | 0.8 | 45 | 33 | 0.2 | 0.2 | 0.2 | 8.4  | Colorado     | 3758  |
| 1995 | 2 | 0.2 | 0.1 | 1   | 0.1 |     |     | 76 | 21 |     |     | 0.1 |      | Colorado     | 3759  |
| 1995 | 3 | 0.3 | 0.2 | 1   | 0.5 |     | 0.2 | 69 | 26 | 0.1 | 0.1 | 0.1 |      | Colorado     | 3761  |
| 1997 | 1 | 0.2 | 0.1 |     |     |     |     | 56 | 19 |     |     | 0.1 | 23.3 | South Africa | 4007  |
| 2009 | 3 | 0.3 | 0.1 | 1.4 | 0.5 | 0.3 | 1.2 | 45 | 24 | 0.9 | 0.7 | 0.7 | 23.0 | Colorado     | 91155 |

Note:

1. The values under different components are the weight percentage in PM<sub>2.5</sub>, %; the number under data source represents the code number in speciate\_5.0\_0
2. SPAP: Database of Source Profiles of Air Pollution (SPAP, <http://www.nkspap.com:9091/>), measured by State Environmental Protection Key Laboratory of Urban Ambient Air Particulate Matter Pollution Prevention and Control & Tianjin Key Laboratory of Urban, Nankai University.

Table S12 Monitoring sites information

| site     | District         | Lon            | Lat           | Meridional grid | Zonal grid |
|----------|------------------|----------------|---------------|-----------------|------------|
| 1        | Ji Zhou          | 117.444        | 40.042        | 43              | 14         |
| 2        | Bao Di           | 117.343        | 39.526        | 29              | 14         |
| 3        | Wu Qing          | 117.044        | 39.373        | 24              | 8          |
| 4        | Ning He          | 117.817        | 39.328        | 25              | 24         |
| 5        | Bei Chen         | 117.185        | 39.226        | 20              | 12         |
| 6        | Dong Li          | 117.375        | 39.151        | 19              | 16         |
| 7        | Xi Qing          | 117.090        | 39.078        | 16              | 10         |
| <b>8</b> | <b>Jin Nan</b>   | <b>117.350</b> | <b>39.001</b> | <b>15</b>       | <b>16</b>  |
| 9        | Jing Hai         | 116.915        | 38.943        | 12              | 7          |
| 10       | Bin Hai New Area | 117.707        | 39.034        | 17              | 23         |

Table S13 The variations of simulated PM<sub>2.5</sub> and its components in CMAQ\_SPE relative to that in CMAQ\_SPA for other monitoring sites (%)

| Components                    | $\Delta P_1$ | $\Delta P_2$ | $\Delta P_3$ | $\Delta P_4$ | $\Delta P_5$ | $\Delta P_6$ | $\Delta P_7$ | $\Delta P_8$ | $\Delta P_9$ | $\Delta P_{10}$ |
|-------------------------------|--------------|--------------|--------------|--------------|--------------|--------------|--------------|--------------|--------------|-----------------|
| SO <sub>4</sub> <sup>2-</sup> | -4           | -7           | -9           | -7           | -8           | -8           | -10          | -9           | -6           | -3              |
| NO <sub>3</sub> <sup>-</sup>  | -3           | -4           | -5           | -5           | -7           | -7           | -11          | -8           | -6           | -5              |
| Cl                            | -43          | -51          | -48          | -47          | -28          | -33          | -26          | -31          | -31          | -43             |
| NH <sub>4</sub> <sup>+</sup>  | -2           | -4           | -5           | -3           | -2           | -3           | -2           | -3           | -2           | -2              |
| Na                            | -68          | -72          | -70          | -68          | -54          | -57          | -50          | -55          | -56          | -60             |
| K                             | -45          | -49          | -47          | -44          | -28          | -32          | -23          | -29          | -30          | -38             |
| Mg                            | -44          | -39          | -39          | -44          | -54          | -52          | -59          | -53          | -54          | -54             |
| Ca                            | -47          | -43          | -44          | -46          | -52          | -51          | -53          | -51          | -51          | -52             |
| OC                            | 53           | 57           | 58           | 53           | 44           | 45           | 34           | 45           | 44           | 39              |
| EC                            | 200          | 211          | 208          | 198          | 166          | 171          | 150          | 167          | 169          | 168             |
| Fe                            | -13          | -12          | -13          | -13          | -16          | -15          | -17          | -16          | -15          | -14             |
| Mn                            | 100          | 91           | 108          | 94           | 125          | 114          | 76           | 126          | 110          | 60              |
| Al                            | -34          | -38          | -39          | -37          | -33          | -34          | -34          | -33          | -33          | -26             |
| Si                            | -27          | -33          | -33          | -30          | -22          | -24          | -21          | -22          | -22          | -16             |
| Ti                            | -59          | -62          | -63          | -61          | -59          | -59          | -59          | -58          | -58          | -50             |
| PM <sub>2.5</sub>             | 0.2          | 0.3          | 0.4          | 0.4          | 0.7          | 0.6          | 0.8          | 0.6          | 0.4          | 0.2             |

$\Delta P_i$  represent the variations of simulated PM<sub>2.5</sub> and its components in CMAQ\_SPE relative to that in CMAQ\_SPA at monitoring site i.

Table S14 The sensitivity coefficients ( $\delta$ ) of simulated components in case DBL at different monitoring sites

| Components                    | $\delta_1$ | $\delta_2$ | $\delta_3$ | $\delta_4$ | $\delta_5$ | $\delta_6$ | $\delta_7$ | $\delta_9$ | $\delta_{10}$ |
|-------------------------------|------------|------------|------------|------------|------------|------------|------------|------------|---------------|
| Al                            | 0.20       | 0.32       | 0.39       | 0.33       | 0.45       | 0.44       | 0.54       | 0.35       | 0.21          |
| Ca                            | 0.18       | 0.29       | 0.36       | 0.30       | 0.42       | 0.41       | 0.51       | 0.32       | 0.18          |
| Cl                            | 0.12       | 0.28       | 0.33       | 0.28       | 0.38       | 0.36       | 0.47       | 0.26       | 0.10          |
| EC                            | 0.18       | 0.29       | 0.36       | 0.30       | 0.41       | 0.41       | 0.51       | 0.32       | 0.18          |
| Fe                            | 0.20       | 0.32       | 0.39       | 0.33       | 0.45       | 0.44       | 0.54       | 0.35       | 0.21          |
| K                             | 0.18       | 0.29       | 0.36       | 0.30       | 0.42       | 0.41       | 0.51       | 0.32       | 0.18          |
| Mg                            | 0.18       | 0.29       | 0.36       | 0.30       | 0.42       | 0.41       | 0.51       | 0.32       | 0.18          |
| Mn                            | 0.20       | 0.32       | 0.39       | 0.33       | 0.45       | 0.44       | 0.54       | 0.35       | 0.21          |
| Na                            | 0.18       | 0.29       | 0.36       | 0.30       | 0.42       | 0.41       | 0.51       | 0.32       | 0.18          |
| OC                            | 0.18       | 0.30       | 0.36       | 0.30       | 0.42       | 0.41       | 0.51       | 0.32       | 0.18          |
| Si                            | 0.20       | 0.32       | 0.39       | 0.33       | 0.45       | 0.44       | 0.54       | 0.35       | 0.21          |
| Ti                            | 0.20       | 0.32       | 0.39       | 0.33       | 0.45       | 0.44       | 0.54       | 0.35       | 0.21          |
| NH <sub>4</sub> <sup>+</sup>  | -12.28     | -16.94     | -19.80     | -16.35     | -20.68     | -20.35     | -23.34     | -17.89     | -8.93         |
| NO <sub>3</sub> <sup>-</sup>  | 1.23       | 1.63       | 1.54       | 1.36       | 1.35       | 1.50       | 1.14       | 1.66       | 1.96          |
| SO <sub>4</sub> <sup>2-</sup> | 0.21       | 0.32       | 0.40       | 0.33       | 0.48       | 0.48       | 0.62       | 0.39       | 0.19          |
| Other                         | 0.18       | 0.29       | 0.36       | 0.30       | 0.42       | 0.41       | 0.51       | 0.33       | 0.18          |

$\delta_i$  represent the sensitivity coefficients ( $\delta$ ) of simulated components in case DBL at monitoring site i (site index is listed in Table S12).

Table S15 The sensitivity coefficients ( $\delta$ ) of simulated components in case DBP at different monitoring sites

| Components | $\delta_1$ | $\delta_2$ | $\delta_3$ | $\delta_4$ | $\delta_5$ | $\delta_6$ | $\delta_7$ | $\delta_9$ | $\delta_{10}$ |
|------------|------------|------------|------------|------------|------------|------------|------------|------------|---------------|
| Al         | 0.20       | 0.33       | 0.40       | 0.34       | 0.46       | 0.45       | 0.54       | 0.35       | 0.21          |
| Ca         | 0.19       | 0.30       | 0.36       | 0.30       | 0.42       | 0.41       | 0.51       | 0.33       | 0.18          |
| Cl         | 0.12       | 0.28       | 0.34       | 0.29       | 0.39       | 0.37       | 0.47       | 0.26       | 0.11          |
| EC         | 0.19       | 0.30       | 0.36       | 0.30       | 0.42       | 0.41       | 0.51       | 0.33       | 0.18          |
| Fe         | 0.20       | 0.33       | 0.40       | 0.34       | 0.46       | 0.45       | 0.54       | 0.35       | 0.21          |
| K          | 0.19       | 0.30       | 0.36       | 0.30       | 0.42       | 0.41       | 0.51       | 0.33       | 0.18          |
| Mg         | 0.19       | 0.30       | 0.36       | 0.30       | 0.42       | 0.41       | 0.51       | 0.33       | 0.18          |
| Mn         | 0.20       | 0.33       | 0.40       | 0.34       | 0.46       | 0.45       | 0.54       | 0.35       | 0.21          |
| Na         | 0.19       | 0.30       | 0.36       | 0.30       | 0.42       | 0.41       | 0.51       | 0.33       | 0.18          |
| OC         | 0.19       | 0.30       | 0.37       | 0.30       | 0.42       | 0.41       | 0.51       | 0.33       | 0.19          |
| Si         | 0.20       | 0.33       | 0.40       | 0.34       | 0.46       | 0.45       | 0.54       | 0.35       | 0.21          |
| Ti         | 0.20       | 0.33       | 0.40       | 0.34       | 0.46       | 0.45       | 0.54       | 0.35       | 0.21          |
| Other      | 0.18       | 0.29       | 0.36       | 0.30       | 0.42       | 0.41       | 0.51       | 0.33       | 0.18          |

$\delta_i$  represent the sensitivity coefficients ( $\delta$ ) of simulated components in case DBP at monitoring site i (site index is listed in Table S12)

Table S16 The sensitivity coefficients ( $\delta$ ) of simulated components in case DBS at different monitoring sites

| Components                    | $\delta_1$ | $\delta_2$ | $\delta_3$ | $\delta_4$ | $\delta_5$ | $\delta_6$ | $\delta_7$ | $\delta_9$ | $\delta_{10}$ |
|-------------------------------|------------|------------|------------|------------|------------|------------|------------|------------|---------------|
| Al                            | -          | -          | -          | -          | -          | -          | -          | -          | -             |
| Ca                            | -          | -          | -          | -          | -          | -          | -          | -          | -             |
| Cl                            | -          | -          | -          | -          | -          | -          | -          | -          | -             |
| EC                            | -          | -          | -          | -          | -          | -          | -          | -          | -             |
| Fe                            | -          | -          | -          | -          | -          | -          | -          | -          | -             |
| K                             | -          | -          | -          | -          | -          | -          | -          | -          | -             |
| Mg                            | -          | -          | -          | -          | -          | -          | -          | -          | -             |
| Mn                            | -          | -          | -          | -          | -          | -          | -          | -          | -             |
| Na                            | -          | -          | -          | -          | -          | -          | -          | -          | -             |
| OC                            | -          | -          | -          | -          | -          | -          | -          | -          | -             |
| Si                            | -          | -          | -          | -          | -          | -          | -          | -          | -             |
| Ti                            | -          | -          | -          | -          | -          | -          | -          | -          | -             |
| NH <sub>4</sub> <sup>+</sup>  | 0.05       | 0.09       | 0.11       | 0.09       | 0.12       | 0.11       | 0.15       | 0.09       | 0.04          |
| NO <sub>3</sub> <sup>-</sup>  | -0.01      | -0.01      | -0.01      | -0.01      | -0.01      | -0.01      | -0.01      | -0.01      | -0.02         |
| SO <sub>4</sub> <sup>2-</sup> | 0.15       | 0.24       | 0.30       | 0.24       | 0.35       | 0.35       | 0.43       | 0.27       | 0.16          |
| Other                         | -0.19      | -0.31      | -0.38      | -0.31      | -0.44      | -0.43      | -0.54      | -0.34      | -0.19         |

$\delta_i$  represent the sensitivity coefficients ( $\delta$ ) of simulated components in case DBS at monitoring site i (site index is listed in Table S12)

Table S17 The sensitivity coefficients ( $\delta$ ) of simulated components in case TPS at different monitoring sites

| Components                    | $\delta_1$ | $\delta_2$ | $\delta_3$ | $\delta_4$ | $\delta_5$ | $\delta_6$ | $\delta_7$ | $\delta_9$ | $\delta_{10}$ |
|-------------------------------|------------|------------|------------|------------|------------|------------|------------|------------|---------------|
| Al                            | -          | -          | -          | -          | -          | -          | -          | -          | -             |
| Ca                            | -          | -          | -          | -          | -          | -          | -          | -          | -             |
| Cl                            | -          | -          | -          | -          | -          | -          | -          | -          | -             |
| EC                            | -          | -          | -          | -          | -          | -          | -          | -          | -             |
| Fe                            | -          | -          | -          | -          | -          | -          | -          | -          | -             |
| K                             | -          | -          | -          | -          | -          | -          | -          | -          | -             |
| Mg                            | -          | -          | -          | -          | -          | -          | -          | -          | -             |
| Mn                            | -          | -          | -          | -          | -          | -          | -          | -          | -             |
| Na                            | -          | -          | -          | -          | -          | -          | -          | -          | -             |
| OC                            | -          | -          | -          | -          | -          | -          | -          | -          | -             |
| Si                            | -          | -          | -          | -          | -          | -          | -          | -          | -             |
| Ti                            | -          | -          | -          | -          | -          | -          | -          | -          | -             |
| NH <sub>4</sub> <sup>+</sup>  | 0.05       | 0.09       | 0.11       | 0.09       | 0.12       | 0.11       | 0.15       | 0.09       | 0.04          |
| NO <sub>3</sub> <sup>-</sup>  | -0.01      | -0.01      | -0.01      | -0.01      | -0.01      | -0.02      | -0.01      | -0.01      | -0.02         |
| SO <sub>4</sub> <sup>2-</sup> | 0.15       | 0.24       | 0.30       | 0.24       | 0.35       | 0.34       | 0.42       | 0.27       | 0.16          |
| Other                         | -0.19      | -0.31      | -0.38      | -0.31      | -0.44      | -0.43      | -0.54      | -0.34      | -0.19         |

$\delta_i$  represent the sensitivity coefficients ( $\delta$ ) of simulated components in case TPS at monitoring site i (site index is listed in Table S12)

Table S18 The sensitivity coefficients ( $\delta$ ) of simulated components in case TWN at different monitoring sites

| Components                    | $\delta_1$ | $\delta_2$ | $\delta_3$ | $\delta_4$ | $\delta_5$ | $\delta_6$ | $\delta_7$ | $\delta_9$ | $\delta_{10}$ |
|-------------------------------|------------|------------|------------|------------|------------|------------|------------|------------|---------------|
| Al                            | -          | -          | -          | -          | -          | -          | -          | -          | -             |
| Ca                            | -          | -          | -          | -          | -          | -          | -          | -          | -             |
| Cl                            | -          | -          | -          | -          | -          | -          | -          | -          | -             |
| EC                            | -          | -          | -          | -          | -          | -          | -          | -          | -             |
| Fe                            | -          | -          | -          | -          | -          | -          | -          | -          | -             |
| K                             | -          | -          | -          | -          | -          | -          | -          | -          | -             |
| Mg                            | -          | -          | -          | -          | -          | -          | -          | -          | -             |
| Mn                            | -          | -          | -          | -          | -          | -          | -          | -          | -             |
| Na                            | -          | -          | -          | -          | -          | -          | -          | -          | -             |
| OC                            | -          | -          | -          | -          | -          | -          | -          | -          | -             |
| Si                            | -          | -          | -          | -          | -          | -          | -          | -          | -             |
| Ti                            | -          | -          | -          | -          | -          | -          | -          | -          | -             |
| NH <sub>4</sub> <sup>+</sup>  | 0.04       | 0.07       | 0.09       | 0.07       | 0.10       | 0.10       | 0.12       | 0.08       | 0.04          |
| NO <sub>3</sub> <sup>-</sup>  | 0.16       | 0.29       | 0.35       | 0.29       | 0.40       | 0.38       | 0.50       | 0.29       | 0.12          |
| SO <sub>4</sub> <sup>2-</sup> | -          | -0.03      | -0.04      | -0.03      | -0.04      | -0.03      | -0.06      | -0.02      | 0.03          |
| Other                         | -0.19      | -0.32      | -0.39      | -0.32      | -0.45      | -0.44      | -0.55      | -0.34      | -0.19         |

$\delta_i$  represent the sensitivity coefficients ( $\delta$ ) of simulated components in case TWN at monitoring site i (site index is listed in Table S12)

Table S19 The sensitivity coefficients ( $\delta$ ) of simulated components in case FON at different monitoring sites

| Components                    | $\delta_1$ | $\delta_2$ | $\delta_3$ | $\delta_4$ | $\delta_5$ | $\delta_6$ | $\delta_7$ | $\delta_9$ | $\delta_{10}$ |
|-------------------------------|------------|------------|------------|------------|------------|------------|------------|------------|---------------|
| Al                            | -          | -          | -          | -          | -          | -          | -          | -          | -             |
| Ca                            | -          | -          | -          | -          | -          | -          | -          | -          | -             |
| Cl                            | -          | -          | -          | -          | -          | -          | -          | -          | -             |
| EC                            | -          | -          | -          | -          | -          | -          | -          | -          | -             |
| Fe                            | -          | -          | -          | -          | -          | -          | -          | -          | -             |
| K                             | -          | -          | -          | -          | -          | -          | -          | -          | -             |
| Mg                            | -          | -          | -          | -          | -          | -          | -          | -          | -             |
| Mn                            | -          | -          | -          | -          | -          | -          | -          | -          | -             |
| Na                            | -          | -          | -          | -          | -          | -          | -          | -          | -             |
| OC                            | -          | -          | -          | -          | -          | -          | -          | -          | -             |
| Si                            | -          | -          | -          | -          | -          | -          | -          | -          | -             |
| Ti                            | -          | -          | -          | -          | -          | -          | -          | -          | -             |
| NH <sub>4</sub> <sup>+</sup>  | 0.04       | 0.07       | 0.09       | 0.07       | 0.10       | 0.10       | 0.12       | 0.07       | 0.04          |
| NO <sub>3</sub> <sup>-</sup>  | 0.15       | 0.28       | 0.35       | 0.29       | 0.40       | 0.38       | 0.49       | 0.29       | 0.12          |
| SO <sub>4</sub> <sup>2-</sup> | -          | -0.03      | -0.04      | -0.03      | -0.04      | -0.03      | -0.06      | -0.02      | 0.03          |
| Other                         | -0.19      | -0.31      | -0.38      | -0.32      | -0.44      | -0.43      | -0.54      | -0.34      | -0.19         |

$\delta_i$  represent the sensitivity coefficients ( $\delta$ ) of simulated components in case FON at monitoring site i (site index is listed in Table S12)

Table S20 The sensitivity coefficients ( $\delta$ ) of simulated components in case OHA at different monitoring sites

| Components                    | $\delta_1$ | $\delta_2$ | $\delta_3$ | $\delta_4$ | $\delta_5$ | $\delta_6$ | $\delta_7$ | $\delta_9$ | $\delta_{10}$ |
|-------------------------------|------------|------------|------------|------------|------------|------------|------------|------------|---------------|
| Al                            | -          | -          | -          | -          | 0.01       | -          | 0.01       | -          | -             |
| Ca                            | -          | -          | -          | -          | -          | -          | -          | -          | -             |
| Cl                            | -          | -          | -          | -          | -          | 0.01       | 0.01       | -          | -             |
| EC                            | -          | -          | -          | -          | 0.01       | -          | 0.01       | -          | -             |
| Fe                            | -          | -          | -          | -          | -          | -          | -          | -          | -             |
| K                             | -          | -          | -          | -          | -          | -          | -          | -          | -             |
| Mg                            | -          | -          | -          | -          | -          | -          | -          | -          | -             |
| Mn                            | -          | -          | -          | -          | -          | -          | -          | -          | -             |
| Na                            | -          | -          | -          | -          | -          | -          | -          | -          | -             |
| OC                            | -          | 0.01       | 0.01       | 0.01       | 0.01       | 0.01       | 0.01       | -          | -             |
| Si                            | -          | 0.01       | 0.01       | 0.01       | 0.01       | 0.01       | 0.01       | 0.01       | -             |
| Ti                            | -          | -          | -          | -          | -          | -          | -          | -          | -             |
| NH <sub>4</sub> <sup>+</sup>  | 0.04       | 0.05       | 0.07       | 0.06       | 0.08       | 0.09       | 0.10       | 0.08       | 0.07          |
| NO <sub>3</sub> <sup>-</sup>  | 0.03       | 0.03       | 0.03       | 0.03       | 0.04       | 0.05       | 0.03       | 0.04       | 0.05          |
| SO <sub>4</sub> <sup>2-</sup> | 0.08       | 0.14       | 0.16       | 0.15       | 0.19       | 0.18       | 0.24       | 0.15       | 0.06          |
| Other                         | -0.17      | -0.25      | -0.31      | -0.26      | -0.36      | -0.36      | -0.44      | -0.30      | -0.18         |

$\delta_i$  represent the sensitivity coefficients ( $\delta$ ) of simulated components in case OHA at monitoring site i (site index is listed in Table S12)

Table S21 The sensitivity coefficients ( $\delta$ ) of simulated components in case THA at different monitoring sites

| Components                    | $\delta_1$ | $\delta_2$ | $\delta_3$ | $\delta_4$ | $\delta_5$ | $\delta_6$ | $\delta_7$ | $\delta_9$ | $\delta_{10}$ |
|-------------------------------|------------|------------|------------|------------|------------|------------|------------|------------|---------------|
| Al                            | -          | -          | -          | -          | 0.01       | -          | 0.01       | -          | -             |
| Ca                            | -          | -          | -          | -          | -          | -          | -          | -          | -             |
| Cl                            | -          | -          | -          | -          | -          | 0.01       | 0.01       | -          | -             |
| EC                            | -          | -          | -          | -          | 0.01       | -          | 0.01       | -          | -             |
| Fe                            | -          | -          | -          | -          | -          | -          | -          | -          | -             |
| K                             | -          | -          | -          | -          | -          | -          | -          | -          | -             |
| Mg                            | -          | -          | -          | -          | -          | -          | -          | -          | -             |
| Mn                            | -          | -          | -          | -          | -          | -          | -          | -          | -             |
| Na                            | -          | -          | -          | -          | -          | -          | -          | -          | -             |
| OC                            | -          | 0.01       | 0.01       | 0.01       | 0.01       | 0.01       | 0.01       | -          | -             |
| Si                            | -          | 0.01       | 0.01       | 0.01       | 0.01       | 0.01       | 0.01       | 0.01       | -             |
| Ti                            | -          | -          | -          | -          | -          | -          | -          | -          | -             |
| NH <sub>4</sub> <sup>+</sup>  | 0.04       | 0.05       | 0.07       | 0.06       | 0.08       | 0.09       | 0.10       | 0.08       | 0.07          |
| NO <sub>3</sub> <sup>-</sup>  | 0.03       | 0.03       | 0.03       | 0.03       | 0.04       | 0.05       | 0.03       | 0.04       | 0.05          |
| SO <sub>4</sub> <sup>2-</sup> | 0.09       | 0.14       | 0.17       | 0.15       | 0.19       | 0.18       | 0.24       | 0.15       | 0.06          |
| Other                         | -0.17      | -0.26      | -0.31      | -0.26      | -0.36      | -0.36      | -0.44      | -0.30      | -0.18         |

$\delta_i$  represent the sensitivity coefficients ( $\delta$ ) of simulated components in case THA at monitoring site i (site index is listed in Table S12)

Table S22 Equilibrium relations and  $K$  used in ISORROPIA II

| Number | Reaction                                                                                                                                             | $K^0$<br>(298.15K)      |
|--------|------------------------------------------------------------------------------------------------------------------------------------------------------|-------------------------|
| I1     | $\text{Ca}(\text{NO}_3)_2(\text{s}) \leftrightarrow \text{Ca}_{(\text{aq})}^{2+} + 2\text{NO}_3^-(\text{aq})$                                        | $6.067 \times 10^5$     |
| I2     | $\text{Ca}(\text{Cl})_2(\text{s}) \leftrightarrow \text{Ca}_{(\text{aq})}^{2+} + 2\text{Cl}^-(\text{aq})$                                            | $7.974 \times 10^{11}$  |
| I3     | $\text{CaSO}_4 \cdot 2\text{H}_2\text{O}(\text{s}) \leftrightarrow \text{Ca}_{(\text{aq})}^{2+} + \text{SO}_4^{2-}(\text{aq}) + 2\text{H}_2\text{O}$ | $4.319 \times 10^{-5}$  |
| I4     | $\text{K}_2\text{SO}_4(\text{s}) \leftrightarrow 2\text{K}_{(\text{aq})}^+ + \text{SO}_4^{2-}(\text{aq})$                                            | $1.569 \times 10^{-2}$  |
| I5     | $\text{KHSO}_4(\text{s}) \leftrightarrow \text{K}_{(\text{aq})}^+ + \text{HSO}_4^-(\text{aq})$                                                       | 24.016                  |
| I6     | $\text{KNO}_3(\text{s}) \leftrightarrow \text{K}_{(\text{aq})}^+ + \text{NO}_3^-(\text{aq})$                                                         | 0.872                   |
| I7     | $\text{KCl}(\text{s}) \leftrightarrow \text{K}_{(\text{aq})}^+ + \text{Cl}^-(\text{aq})$                                                             | 8.680                   |
| I8     | $\text{MgSO}_4(\text{s}) \leftrightarrow \text{Mg}_{(\text{aq})}^{2+} + \text{SO}_4^{2-}(\text{aq})$                                                 | $1.079 \times 10^5$     |
| I9     | $\text{Mg}(\text{NO}_3)_2(\text{s}) \leftrightarrow \text{Mg}_{(\text{aq})}^{2+} + 2\text{NO}_3^-(\text{aq})$                                        | $2.507 \times 10^{15}$  |
| I10    | $\text{Mg}(\text{Cl})_2(\text{s}) \leftrightarrow \text{Mg}_{(\text{aq})}^{2+} + 2\text{Cl}^-(\text{aq})$                                            | $9.557 \times 10^{21}$  |
| I11    | $\text{HSO}_4^-(\text{aq}) \leftrightarrow \text{H}_{(\text{aq})}^+ + \text{SO}_4^{2-}(\text{aq})$                                                   | $1.015 \times 10^{-2}$  |
| I12    | $\text{NH}_3(\text{g}) \leftrightarrow \text{NH}_3(\text{aq})$                                                                                       | 57.64                   |
| I13    | $\text{NH}_3(\text{aq}) + \text{H}_2\text{O}(\text{aq}) \leftrightarrow \text{NH}_4^+(\text{aq}) + \text{OH}^-(\text{aq})$                           | $1.805 \times 10^{-5}$  |
| I14    | $\text{HNO}_3(\text{g}) \leftrightarrow \text{H}_{(\text{aq})}^+ + \text{NO}_3^-(\text{aq})$                                                         | $2.511 \times 10^6$     |
| I15    | $\text{HNO}_3(\text{g}) \leftrightarrow \text{HNO}_3(\text{aq})$                                                                                     | $2.1 \times 10^5$       |
| I16    | $\text{HCl}(\text{g}) \leftrightarrow \text{H}_{(\text{aq})}^+ + \text{Cl}^-(\text{aq})$                                                             | $1.971 \times 10^6$     |
| I17    | $\text{HCl}(\text{g}) \leftrightarrow \text{HCl}(\text{aq})$                                                                                         | $2.5 \times 10^3$       |
| I18    | $\text{H}_2\text{O}(\text{aq}) \leftrightarrow \text{H}_{(\text{aq})}^+ + \text{OH}^-(\text{aq})$                                                    | $1.010 \times 10^{-14}$ |
| I19    | $\text{Na}_2\text{SO}_4(\text{s}) \leftrightarrow 2\text{Na}_{(\text{aq})}^+ + \text{SO}_4^{2-}(\text{aq})$                                          | 0.4799                  |
| I20    | $(\text{NH}_4)_2\text{SO}_4(\text{s}) \leftrightarrow 2\text{NH}_4^+(\text{aq}) + \text{SO}_4^{2-}(\text{aq})$                                       | 1.817                   |



|     |                                                                                                                            |                         |
|-----|----------------------------------------------------------------------------------------------------------------------------|-------------------------|
| I21 | $\text{NH}_4\text{Cl}_{(s)} \leftrightarrow \text{NH}_3(g) + \text{HCl}_{(g)}$                                             | $1.086 \times 10^{-16}$ |
| I22 | $\text{NaNO}_{3(s)} \leftrightarrow \text{Na}_{(aq)}^+ + \text{NO}_3^-(aq)$                                                | 11.97                   |
| I23 | $\text{NaCl}_{(s)} \leftrightarrow \text{Na}_{(aq)}^+ + \text{Cl}_{(aq)}^-$                                                | 37.66                   |
| I24 | $\text{NaHSO}_{4(s)} \leftrightarrow \text{Na}_{(aq)}^+ + \text{HSO}_4^-(aq)$                                              | $2.413 \times 10^4$     |
| I25 | $\text{NH}_4\text{NO}_{3(s)} \leftrightarrow \text{NH}_3(g) + \text{HNO}_3(g)$                                             | $4.199 \times 10^{-17}$ |
| I26 | $\text{NH}_4\text{HSO}_{4(s)} \leftrightarrow \text{NH}_4^+(aq) + \text{HSO}_4^-(aq)$                                      | 1.383                   |
| I27 | $(\text{NH}_4)_3\text{H}(\text{SO}_4)_2(s) \leftrightarrow 3\text{NH}_4^+(aq) + \text{HSO}_4^-(aq) + \text{SO}_4^{2-}(aq)$ | 29.72                   |

Source: (Fountoukis and Nenes, 2007)

Table S23 Main reactions related to sulfate and nitrate production in CMAQ

| Gas-phase chemistry (G)      |                                                                                                             |
|------------------------------|-------------------------------------------------------------------------------------------------------------|
| G1                           | $\text{SO}_2 + \text{OH} + \text{H}_2\text{O} + \text{O}_2 \rightarrow \text{H}_2\text{SO}_4 + \text{HO}_2$ |
| G2                           | $\text{NO}_2 + \text{OH} \rightarrow \text{HNO}_3$                                                          |
| G3                           | $\text{N}_2\text{O}_5 + \text{H}_2\text{O} \rightarrow 2\text{HNO}_3$                                       |
| G4                           | $\text{NO}_3 + \text{HO}_2 \rightarrow \text{HNO}_3 + \text{O}_2$                                           |
| G5                           | $\text{NTR} + \text{OH} \rightarrow \text{HNO}_3$                                                           |
| G6                           | $\text{NO}_3 + \text{VOCs} \rightarrow \text{HNO}_3$                                                        |
| Aqueous-phase chemistry (Aq) |                                                                                                             |
| Aq1                          | $\text{HSO}_3^- + \text{H}_2\text{O}_2 \rightarrow \text{SO}_4^{2-} + \text{H}^+$                           |
| Aq2                          | $\text{SO}_2 + \text{O}_3 \rightarrow \text{SO}_4^{2-} + 2\text{H}^+$                                       |
| Aq3                          | $\text{HSO}_3^- + \text{O}_3 \rightarrow \text{SO}_4^{2-} + \text{H}^+$                                     |
| Aq4                          | $\text{SO}_3^{2-} + \text{O}_3 \rightarrow \text{SO}_4^{2-}$                                                |
| Aq5                          | $\text{HSO}_3^- + \text{MHP} \rightarrow \text{SO}_4^{2-} + \text{H}^+$                                     |
| Aq6                          | $\text{HSO}_3^- + \text{PAA} \rightarrow \text{SO}_4^{2-} + \text{H}^+$                                     |
| Aq7                          | $\text{S(IV)} + \text{Fe(III)/Mn(II)} \rightarrow \text{SO}_4^{2-}$                                         |
| Heterogeneous chemistry (H)  |                                                                                                             |
| H1                           | $\text{N}_2\text{O}_5 + \text{H}_2\text{O} \rightarrow 2\text{HNO}_3$                                       |
| H2                           | $2\text{NO}_2 + \text{H}_2\text{O} \rightarrow \text{HONO} + \text{HNO}_3$                                  |

NTR: Organic nitrate; MHP: methyl hydroperoxide; PAA: peroxyacetic acid.

Source: (Zheng et al., 2015; Chapel Hill, 2012)

Table S24 Calculation method for sensitivity coefficient of gaseous pollutants

|             |                                                                                                                                                                                                                                                                                                                                                                                                                                                   |
|-------------|---------------------------------------------------------------------------------------------------------------------------------------------------------------------------------------------------------------------------------------------------------------------------------------------------------------------------------------------------------------------------------------------------------------------------------------------------|
| Equation    | $\delta_i = \frac{C_{i\_case} - C_{i\_base}}{P_{j\_case} - P_{j\_base}} \times 100\%$                                                                                                                                                                                                                                                                                                                                                             |
| Description | $C_{i\_case}$ is the simulation result of gas pollutant $i$ in different sensitivity experiment cases, $\mu\text{g}/\text{m}^3$ ; $C_{i\_base}$ is the simulation result of gas pollutant $i$ in base case, $\mu\text{g}/\text{m}^3$ ; $P_{case}$ is the sum of the percentage of perturbed components which cause the variation of gas pollutant in sensitivity experiment cases, %; $P_{base}$ is the percentage of $P_{case}$ in base case, %. |

Table S25 The sensitivity coefficients ( $\delta$ ) of gas pollutants from different cases at different monitoring sites

| Cases and sites | $\delta_{\text{SO}_2}$ | $\delta_{\text{NH}_3}$ | $\delta_{\text{NO}_x}$ |
|-----------------|------------------------|------------------------|------------------------|
| 1DBL            | -0.08                  | 0.05                   | -0.006                 |
| 1DBP            | -0.15                  | 0.20                   | -0.008                 |
| 1DBS            | 0.02                   | -0.18                  | -0.002                 |
| 1TPS            | 0.02                   | -0.18                  | -0.002                 |
| 1TWN            | 0.02                   | -0.12                  | 0.002                  |
| 1FON            | 0.02                   | -0.12                  | 0.002                  |
| 1OHA            | -0.07                  | 0.46                   | 0.001                  |
| 1THA            | -0.07                  | 0.46                   | 0.001                  |
| 2DBL            | -0.03                  | 0.04                   | -0.005                 |
| 2DBP            | -0.02                  | 0.16                   | -0.006                 |
| 2DBS            | 0.03                   | -0.17                  | -0.002                 |
| 2TPS            | 0.01                   | -0.17                  | -0.002                 |
| 2TWN            | 0.02                   | -0.13                  | 0.002                  |
| 2FON            | 0.02                   | -0.13                  | 0.001                  |
| 2OHA            | -0.07                  | 0.44                   | 0.001                  |
| 2THA            | -0.03                  | 0.44                   | 0.001                  |
| 3DBL            | -0.03                  | 0.06                   | -0.004                 |
| 3DBP            | -0.05                  | 0.27                   | -0.005                 |
| 3DBS            | 0.04                   | -0.28                  | -0.002                 |
| 3TPS            | 0.04                   | -0.28                  | -0.001                 |
| 3TWN            | 0.03                   | -0.21                  | 0.001                  |
| 3FON            | 0.03                   | -0.21                  | 0.001                  |
| 3OHA            | -0.04                  | 0.73                   | 0.001                  |
| 3THA            | -0.04                  | 0.73                   | 0.001                  |
| 4DBL            | -0.05                  | 0.04                   | -0.004                 |
| 4DBP            | -0.07                  | 0.17                   | -0.005                 |
| 4DBS            | 0.04                   | -0.18                  | -0.002                 |
| 4TPS            | 0.04                   | -0.18                  | -0.002                 |
| 4TWN            | 0.03                   | -0.14                  | 0.001                  |
| 4FON            | 0.03                   | -0.14                  | 0.001                  |

|       |       |       |        |
|-------|-------|-------|--------|
| 4OHA  | -0.11 | 0.47  | 0.001  |
| 4THA  | -0.07 | 0.47  | 0.001  |
| 5DBL  | 0.00  | 0.10  | -0.002 |
| 5DBP  | -0.02 | 0.45  | -0.002 |
| 5DBS  | 0.04  | -0.48 | -0.001 |
| 5TPS  | 0.04  | -0.48 | -0.001 |
| 5TWN  | 0.03  | -0.37 | 0.000  |
| 5FON  | 0.03  | -0.37 | 0.000  |
| 5OHA  | -0.11 | 1.30  | 0.000  |
| 5THA  | -0.11 | 1.30  | 0.000  |
| 6DBL  | -0.05 | 0.15  | -0.002 |
| 6DBP  | -0.11 | 0.64  | -0.003 |
| 6DBS  | 0.05  | -0.64 | -0.001 |
| 6TPS  | 0.05  | -0.65 | -0.001 |
| 6TWN  | 0.04  | -0.50 | 0.000  |
| 6FON  | 0.04  | -0.50 | 0.000  |
| 6OHA  | -0.14 | 1.76  | 0.001  |
| 6THA  | -0.14 | 1.77  | 0.001  |
| 7DBL  | -0.05 | 0.14  | -0.001 |
| 7DBP  | -0.11 | 0.59  | -0.001 |
| 7DBS  | 0.05  | -0.69 | 0.000  |
| 7TPS  | 0.05  | -0.70 | 0.000  |
| 7TWN  | 0.04  | -0.55 | 0.000  |
| 7FON  | 0.04  | -0.55 | 0.000  |
| 7OHA  | -0.15 | 1.92  | 0.000  |
| 7THA  | -0.15 | 1.93  | 0.000  |
| 9DBL  | -0.07 | 0.09  | -0.003 |
| 9DBP  | -0.13 | 0.38  | -0.004 |
| 9DBS  | 0.05  | -0.39 | -0.001 |
| 9TPS  | 0.05  | -0.39 | -0.001 |
| 9TWN  | 0.04  | -0.28 | 0.001  |
| 9FON  | 0.04  | -0.28 | 0.001  |
| 9OHA  | -0.14 | 1.02  | 0.001  |
| 9THA  | -0.14 | 1.02  | 0.001  |
| 10DBL | -0.09 | 0.13  | -0.004 |
| 10DBP | -0.16 | 0.53  | -0.006 |
| 10DBS | 0.04  | -0.54 | -0.002 |
| 10TPS | 0.04  | -0.53 | -0.002 |
| 10TWN | 0.03  | -0.36 | 0.001  |
| 10FON | 0.03  | -0.36 | 0.001  |
| 10OHA | -0.12 | 1.39  | 0.001  |
| 10THA | -0.12 | 1.40  | 0.001  |

---

1DBL represent the simulation results of case DBL in site 1 (which is listed in Table S25 ‘cases and sites’ column), and the others named by the same rule.

Table S26 The selected information of source profile in SPECIATE and SAPPC database

| Code                  | Profile Name                                | Controls                                                                                                                         | Profile Date | Profile Notes                                                                                                    | Keywords                                          | Match MEIC source |
|-----------------------|---------------------------------------------|----------------------------------------------------------------------------------------------------------------------------------|--------------|------------------------------------------------------------------------------------------------------------------|---------------------------------------------------|-------------------|
| 91041 <sup>a</sup>    | Draft Sub-Bituminous Combustion - Composite | Mixture of Baghouse, None, Electrostatic Precipitator, Wet Scrubber, Mechanical Collectors, Dry Lime Scrubber, Ammonia Injection | 2006-5-24    | Replaced by Profile 91110. Median of Profiles 3191, 3192, 3690, 3694, and 3700                                   | Sub-Bituminous Coal Combustion; PM Composite      | PP                |
| 900162.5 <sup>b</sup> | Industrial Manufacturing - Average          | Not Applicable                                                                                                                   | 1989-1-5     | Average profile developed from original profiles representing the source category group 3xxxxxxx                 | INDUSTRIAL                                        | IN                |
| 91155 <sup>c</sup>    | Residential Coal Combustion - Composite     | Uncontrolled                                                                                                                     | 2009-7-12    | Median of Profiles 3761, 432012.5                                                                                | Residential Coal Combustion; Inventory speciation | RE                |
| 91022 <sup>a</sup>    | Draft On-road Gasoline Exhaust - Composite  | Mixture of Catalytic converter and Not available                                                                                 | 2006-5-24    | Replaced by Profile 91122. Median of Profiles 311072.5, 3517, 3884, 3892, 3904, 3947, 3951, 3955, 3959, and 4558 | On-road Gasoline Exhaust; PM Composite            | TR                |
| 91162 <sup>c</sup>    | LDDV Exhaust - Composite                    | Mixture of Catalytic converter and Not available                                                                                 | 2009-7-12    | Median of Profiles 321042.5, 3912, 3963, 4675                                                                    | LDDV Exhaust; Inventory speciation                |                   |

|                    |                                 |                                                                                                               |                                                                         |    |
|--------------------|---------------------------------|---------------------------------------------------------------------------------------------------------------|-------------------------------------------------------------------------|----|
| Local <sup>d</sup> | Coal combustion by power plants | Mixture of Baghouse, None, Electrostatic Precipitator, Wet Scrubber, Mechanical Collectors, Dry Lime Scrubber | Average of profiles power and heating power plant                       | PP |
| Local <sup>d</sup> | Industrial processes            | Wet Scrubber, Dry Lime Scrubber                                                                               | Average of profiles steel, metallurgy, cement, glass, industrial boiler | IN |
| Local <sup>d</sup> | Transportation sector           | Mixture of Catalytic converter                                                                                | Average of profiles gasoline, diesel, gasoline-diesel exhaust           | TR |
| Local <sup>d</sup> | Residential emission            |                                                                                                               | Average of profiles civil boiler                                        | RE |

a, Hsu, Ying, Randy Strait, Stephen Roe, David Holoman. 2006. 'SPECIATE 4.0 Speciation database development document - Final Report', Prepared for US EPA, RTP, NC, EPA Contract Nos. EP-D-06-001, Work Assignment Numbers 0-03 and 68-D-02-063, WA 4-04 and WA 5-05, by E.H. Pechan & Associates, Incorporation, Durham, NC. [https://www.epa.gov/sites/production/files/2015-10/documents/speciatedoc\\_1206.pdf](https://www.epa.gov/sites/production/files/2015-10/documents/speciatedoc_1206.pdf).

b, Shareef, G. S. Engineering Judgement, Radian Corporation. August 1987.

c, Reff, Adam, Prakash V Bhave, Heather Simon, Thompson G Pace, George A Pouliot, J David Mobley, and Marc Houyoux. 2009. 'Emissions Inventory of PM<sub>2.5</sub> Trace Elements across the United States', Environmental Science & Technology, 43, no. 15: 5790-96. DOI: 10.1021/es802930x.

d, Database of Source Profiles of Air Pollution (SPAP), measured by State Environmental Protection Key Laboratory of Urban Ambient Air Particulate Matter Pollution Prevention and Control & Tianjin Key Laboratory of Urban, Nankai University. Coal combustion by power plants (PP), industrial processes (IN), residential emission (RE) and transportation sector (TR).

Table S27 Potential species for the five aerosol types

| R <sub>1</sub>      | R <sub>2</sub>    | R <sub>3</sub>    | Aerosol type                                      | Solid phase                                                                                                                                                                                                                                                                                               |
|---------------------|-------------------|-------------------|---------------------------------------------------|-----------------------------------------------------------------------------------------------------------------------------------------------------------------------------------------------------------------------------------------------------------------------------------------------------------|
| R <sub>1</sub> <1   | any value         | any value         | Sulfate Rich (free acid)                          | NaHSO <sub>4</sub> , NH <sub>4</sub> HSO <sub>4</sub> , KHSO <sub>4</sub> , CaSO <sub>4</sub>                                                                                                                                                                                                             |
| 1≤R <sub>1</sub> ≤2 | any value         | any value         | Sulfate Rich                                      | NaHSO <sub>4</sub> , NH <sub>4</sub> HSO <sub>4</sub> , Na <sub>2</sub> SO <sub>4</sub> , (NH <sub>4</sub> ) <sub>2</sub> SO <sub>4</sub> , (NH <sub>4</sub> ) <sub>3</sub> H(SO <sub>4</sub> ) <sub>2</sub> , CaSO <sub>4</sub> , KHSO <sub>4</sub> , K <sub>2</sub> SO <sub>4</sub> , MgSO <sub>4</sub> |
| R <sub>1</sub> ≥2   | R <sub>2</sub> <2 | any value         | Sulfate Poor, Crustal & Sodium Poor               | Na <sub>2</sub> SO <sub>4</sub> , (NH <sub>4</sub> ) <sub>2</sub> SO <sub>4</sub> , NH <sub>4</sub> NO <sub>3</sub> , NH <sub>4</sub> Cl, CaSO <sub>4</sub> , K <sub>2</sub> SO <sub>4</sub> , MgSO <sub>4</sub>                                                                                          |
| R <sub>1</sub> ≥2   | R <sub>2</sub> ≥2 | R <sub>3</sub> <2 | Sulfate Poor, Crustal & Sodium Rich, Crustal Poor | Na <sub>2</sub> SO <sub>4</sub> , NaNO <sub>3</sub> , NaCl, NH <sub>4</sub> NO <sub>3</sub> , NH <sub>4</sub> Cl, CaSO <sub>4</sub> , K <sub>2</sub> SO <sub>4</sub> , MgSO <sub>4</sub>                                                                                                                  |
| R <sub>1</sub> ≥2   | R <sub>2</sub> ≥2 | R <sub>3</sub> >2 | Sulfate Poor, Crustal & Sodium Rich, Crustal Rich | NaNO <sub>3</sub> , NaCl, NH <sub>4</sub> NO <sub>3</sub> , NH <sub>4</sub> Cl, CaSO <sub>4</sub> , K <sub>2</sub> SO <sub>4</sub> , MgSO <sub>4</sub> , Ca(NO <sub>3</sub> ) <sub>2</sub> , CaCl <sub>2</sub> , Mg(NO <sub>3</sub> ) <sub>2</sub> , MgCl <sub>2</sub> , KNO <sub>3</sub> , KCl           |

Table S28 The sensitivity coefficients ( $\delta$ ) of simulated components for different meteorological pattern

| Pattern I                     |        |      |       |       |       |       |       |       |
|-------------------------------|--------|------|-------|-------|-------|-------|-------|-------|
| Components                    | DBL    | DBP  | DBS   | TPS   | TWN   | FON   | OHA   | THA   |
| EC                            | 0.35   | 0.35 | 0.00  | 0.00  | 0.00  | 0.00  | 0.00  | 0.00  |
| OC                            | 0.35   | 0.36 | 0.00  | 0.00  | 0.00  | 0.00  | 0.00  | 0.00  |
| Fe                            | 0.39   | 0.39 | 0.00  | 0.00  | 0.00  | 0.00  | 0.00  | 0.00  |
| Mn                            | 0.39   | 0.39 | 0.00  | 0.00  | 0.00  | 0.00  | 0.00  | 0.00  |
| Ti                            | 0.39   | 0.39 | 0.00  | 0.00  | 0.00  | 0.00  | 0.00  | 0.00  |
| Al                            | 0.39   | 0.39 | 0.00  | 0.00  | 0.00  | 0.00  | 0.00  | 0.00  |
| Si                            | 0.39   | 0.39 | 0.00  | 0.00  | 0.00  | 0.00  | 0.00  | 0.00  |
| Ca                            | 0.35   | 0.35 | 0.00  | 0.00  | 0.00  | 0.00  | 0.00  | 0.00  |
| Mg                            | 0.35   | 0.35 | 0.00  | 0.00  | 0.00  | 0.00  | 0.00  | 0.00  |
| K                             | 0.35   | 0.35 | 0.00  | 0.00  | 0.00  | 0.00  | 0.00  | 0.00  |
| Na                            | 0.35   | 0.35 | 0.00  | 0.00  | 0.00  | 0.00  | 0.00  | 0.00  |
| Cl                            | 0.26   | 0.27 | 0.00  | 0.00  | 0.00  | 0.00  | 0.01  | 0.01  |
| NH <sub>4</sub> <sup>+</sup>  | -19.04 |      | 0.09  | 0.08  | 0.07  | 0.07  | 0.13  | 0.12  |
| NO <sub>3</sub> <sup>-</sup>  | 1.01   |      | -0.03 | -0.03 | 0.27  | 0.27  | 0.08  | 0.07  |
| SO <sub>4</sub> <sup>2-</sup> | 0.40   |      | 0.32  | 0.32  | 0.01  | 0.01  | 0.11  | 0.12  |
| Other                         | 0.36   | 0.36 | -0.37 | -0.37 | -0.36 | -0.36 | -0.34 | -0.34 |
| Pattern II                    |        |      |       |       |       |       |       |       |
| Components                    | DBL    | DBP  | DBS   | TPS   | TWN   | FON   | OHA   | THA   |
| EC                            | 0.43   | 0.44 | 0.00  | 0.00  | 0.00  | 0.00  | 0.01  | 0.01  |
| OC                            | 0.43   | 0.44 | 0.00  | 0.00  | 0.00  | 0.00  | 0.01  | 0.01  |
| Fe                            | 0.46   | 0.47 | 0.00  | 0.00  | 0.00  | 0.00  | 0.00  | 0.00  |
| Mn                            | 0.46   | 0.47 | 0.00  | 0.00  | 0.00  | 0.00  | 0.00  | 0.00  |
| Ti                            | 0.46   | 0.47 | 0.00  | 0.00  | 0.00  | 0.00  | 0.00  | 0.00  |

|                               |        |      |       |       |       |       |       |       |
|-------------------------------|--------|------|-------|-------|-------|-------|-------|-------|
| Al                            | 0.46   | 0.47 | 0.00  | 0.00  | 0.00  | 0.00  | 0.01  | 0.01  |
| Si                            | 0.46   | 0.47 | 0.00  | 0.00  | 0.00  | 0.00  | 0.01  | 0.01  |
| Ca                            | 0.43   | 0.44 | 0.00  | 0.00  | 0.00  | 0.00  | 0.00  | 0.00  |
| Mg                            | 0.43   | 0.44 | 0.00  | 0.00  | 0.00  | 0.00  | 0.00  | 0.00  |
| K                             | 0.43   | 0.44 | 0.00  | 0.00  | 0.00  | 0.00  | 0.00  | 0.00  |
| Na                            | 0.43   | 0.44 | 0.00  | 0.00  | 0.00  | 0.00  | 0.00  | 0.00  |
| Cl                            | 0.37   | 0.38 | 0.00  | 0.00  | 0.00  | 0.00  | 0.01  | 0.01  |
| NH <sub>4</sub> <sup>+</sup>  | -23.29 |      | 0.12  | 0.12  | 0.10  | 0.10  | 0.11  | 0.10  |
| NO <sub>3</sub> <sup>-</sup>  | 1.54   |      | -0.02 | -0.02 | 0.37  | 0.37  | 0.07  | 0.07  |
| SO <sub>4</sub> <sup>2-</sup> | 0.46   |      | 0.39  | 0.39  | -0.01 | -0.01 | 0.13  | 0.13  |
| Other                         | 0.44   | 0.44 | -0.46 | -0.46 | -0.45 | -0.45 | -0.37 | -0.37 |

Pattern III

| Components                    | DBL    | DBP  | DBS   | TPS   | TWN   | FON   | OHA   | THA   |
|-------------------------------|--------|------|-------|-------|-------|-------|-------|-------|
| EC                            | 0.40   | 0.41 | 0.00  | 0.00  | 0.00  | 0.00  | 0.00  | 0.00  |
| OC                            | 0.40   | 0.41 | 0.00  | 0.00  | 0.00  | 0.00  | 0.01  | 0.01  |
| Fe                            | 0.44   | 0.44 | 0.00  | 0.00  | 0.00  | 0.00  | 0.00  | 0.00  |
| Mn                            | 0.44   | 0.44 | 0.00  | 0.00  | 0.00  | 0.00  | 0.00  | 0.00  |
| Ti                            | 0.44   | 0.44 | 0.00  | 0.00  | 0.00  | 0.00  | 0.00  | 0.00  |
| Al                            | 0.44   | 0.44 | 0.00  | 0.00  | 0.00  | 0.00  | 0.01  | 0.01  |
| Si                            | 0.44   | 0.44 | 0.00  | 0.00  | 0.00  | 0.00  | 0.01  | 0.01  |
| Ca                            | 0.40   | 0.41 | 0.00  | 0.00  | 0.00  | 0.00  | 0.00  | 0.00  |
| Mg                            | 0.40   | 0.41 | 0.00  | 0.00  | 0.00  | 0.00  | 0.00  | 0.00  |
| K                             | 0.40   | 0.41 | 0.00  | 0.00  | 0.00  | 0.00  | 0.00  | 0.00  |
| Na                            | 0.40   | 0.41 | 0.00  | 0.00  | 0.00  | 0.00  | 0.00  | 0.00  |
| Cl                            | 0.33   | 0.34 | 0.00  | 0.00  | 0.00  | 0.00  | 0.01  | 0.01  |
| NH <sub>4</sub> <sup>+</sup>  | -23.56 |      | 0.11  | 0.11  | 0.09  | 0.09  | 0.11  | 0.11  |
| NO <sub>3</sub> <sup>-</sup>  | 1.35   |      | -0.02 | -0.02 | 0.34  | 0.34  | 0.06  | 0.06  |
| SO <sub>4</sub> <sup>2-</sup> | 0.43   |      | 0.36  | 0.36  | -0.01 | -0.01 | 0.13  | 0.13  |
| Other                         | 0.41   | 0.41 | -0.43 | -0.43 | -0.42 | -0.42 | -0.35 | -0.35 |

Pattern VI

| Components                   | DBL    | DBP  | DBS  | TPS  | TWN  | FON  | OHA  | THA  |
|------------------------------|--------|------|------|------|------|------|------|------|
| EC                           | 0.40   | 0.41 | 0.00 | 0.00 | 0.00 | 0.00 | 0.01 | 0.01 |
| OC                           | 0.41   | 0.41 | 0.00 | 0.00 | 0.00 | 0.00 | 0.01 | 0.01 |
| Fe                           | 0.44   | 0.45 | 0.00 | 0.00 | 0.00 | 0.00 | 0.00 | 0.00 |
| Mn                           | 0.44   | 0.45 | 0.00 | 0.00 | 0.00 | 0.00 | 0.00 | 0.00 |
| Ti                           | 0.44   | 0.45 | 0.00 | 0.00 | 0.00 | 0.00 | 0.00 | 0.00 |
| Al                           | 0.44   | 0.45 | 0.00 | 0.00 | 0.00 | 0.00 | 0.01 | 0.01 |
| Si                           | 0.44   | 0.45 | 0.00 | 0.00 | 0.00 | 0.00 | 0.01 | 0.01 |
| Ca                           | 0.40   | 0.41 | 0.00 | 0.00 | 0.00 | 0.00 | 0.00 | 0.00 |
| Mg                           | 0.40   | 0.41 | 0.00 | 0.00 | 0.00 | 0.00 | 0.00 | 0.00 |
| K                            | 0.40   | 0.41 | 0.00 | 0.00 | 0.00 | 0.00 | 0.00 | 0.00 |
| Na                           | 0.40   | 0.41 | 0.00 | 0.00 | 0.00 | 0.00 | 0.00 | 0.00 |
| Cl                           | 0.35   | 0.36 | 0.00 | 0.00 | 0.00 | 0.00 | 0.01 | 0.01 |
| NH <sub>4</sub> <sup>+</sup> | -24.00 |      | 0.11 | 0.11 | 0.09 | 0.09 | 0.10 | 0.10 |

|                    |      |      |       |       |       |       |       |       |
|--------------------|------|------|-------|-------|-------|-------|-------|-------|
| $\text{NO}_3^-$    | 0.96 |      | -0.02 | -0.02 | 0.36  | 0.36  | 0.05  | 0.05  |
| $\text{SO}_4^{2-}$ | 0.43 |      | 0.35  | 0.35  | -0.02 | -0.02 | 0.15  | 0.15  |
| Other              | 0.41 | 0.41 | -0.43 | -0.43 | -0.42 | -0.42 | -0.35 | -0.35 |

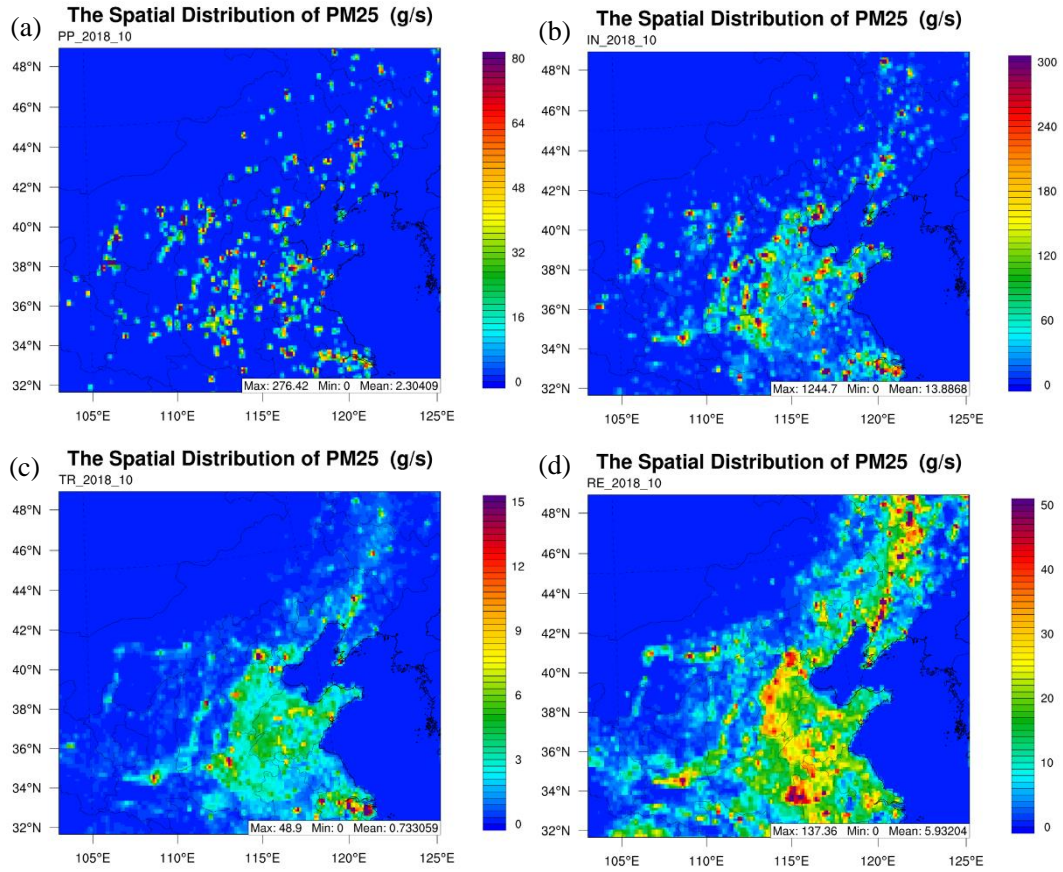

Figure S1 The regional distribution of PM<sub>2.5</sub> emission sources. (a) coal-fired power plant; (b) industry process; (c) transportation sector; (d) residential coal combustion.



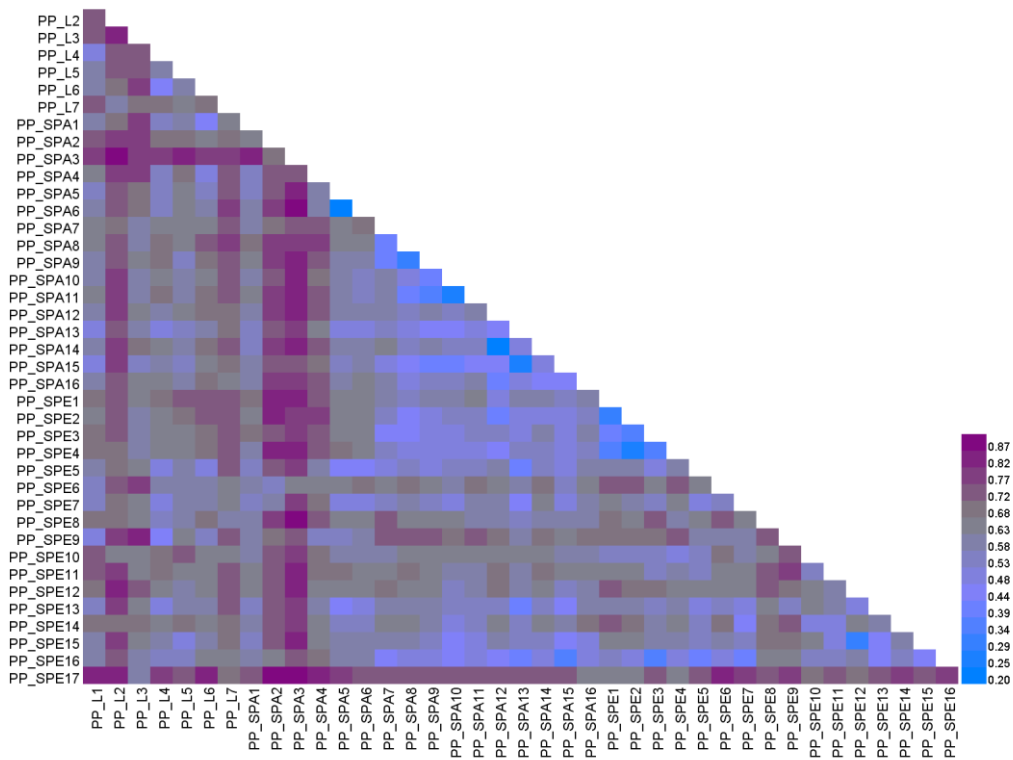

Figure S2 The coefficient divergence values for PP source profile

Note: Power plant source profiles from published literatures in China (PP\_L), SPAP (PP\_SPA) and SPECIATE database (PP\_SPE). Numbers represent source profile sequence number.

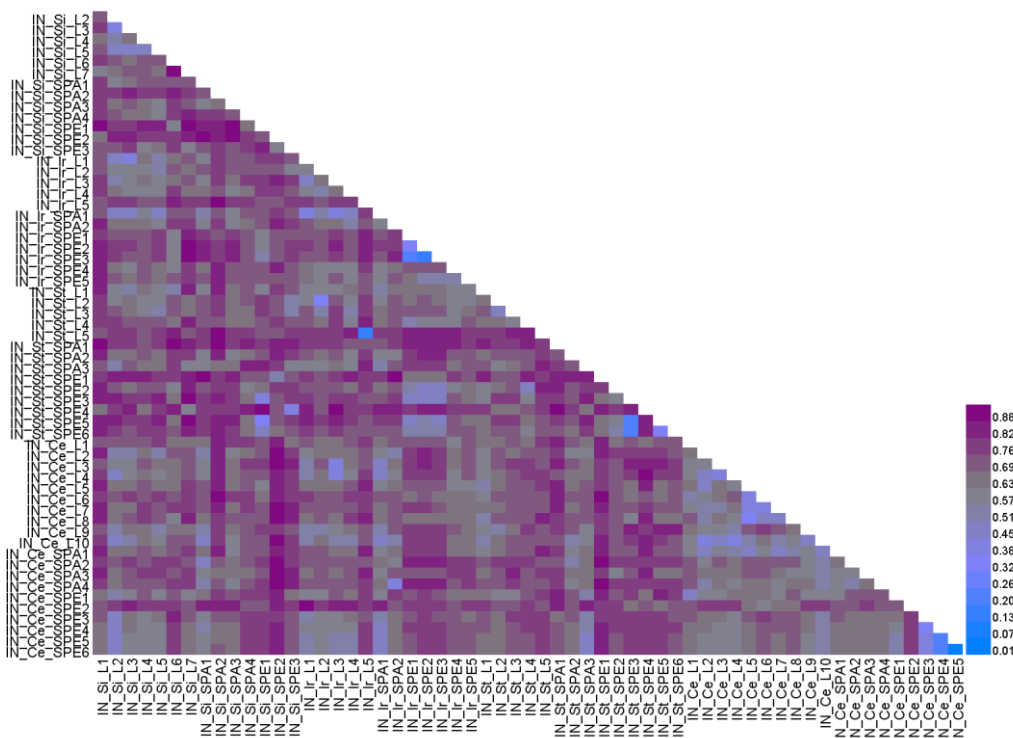

Figure S3 The coefficient divergence values for IN source profile

Note: Industrial process (Sintering) source profiles from published literatures (IN\_Si\_L) in China, SPAP (IN\_Si\_SPA) and SPECIATE database (IN\_Si\_SPE); Industrial process (Iron-making)

source profiles from published literatures in China (IN\_Ir\_L), SPAP (IN\_Ir\_SPA) and SPECIATE database (IN\_Ir\_SPE); Industrial process (Steelmaking) source profiles from published literatures in China (IN\_St\_L), SPAP (IN\_St\_SPA) and SPECIATE (IN\_St\_SPE) database; Industrial process (Cement) source profiles from published literatures in China (IN\_Ce\_L), SPAP (IN\_Ce\_SPA) and SPECIATE database (IN\_Ce\_SPE). Numbers represent source profile sequence number.

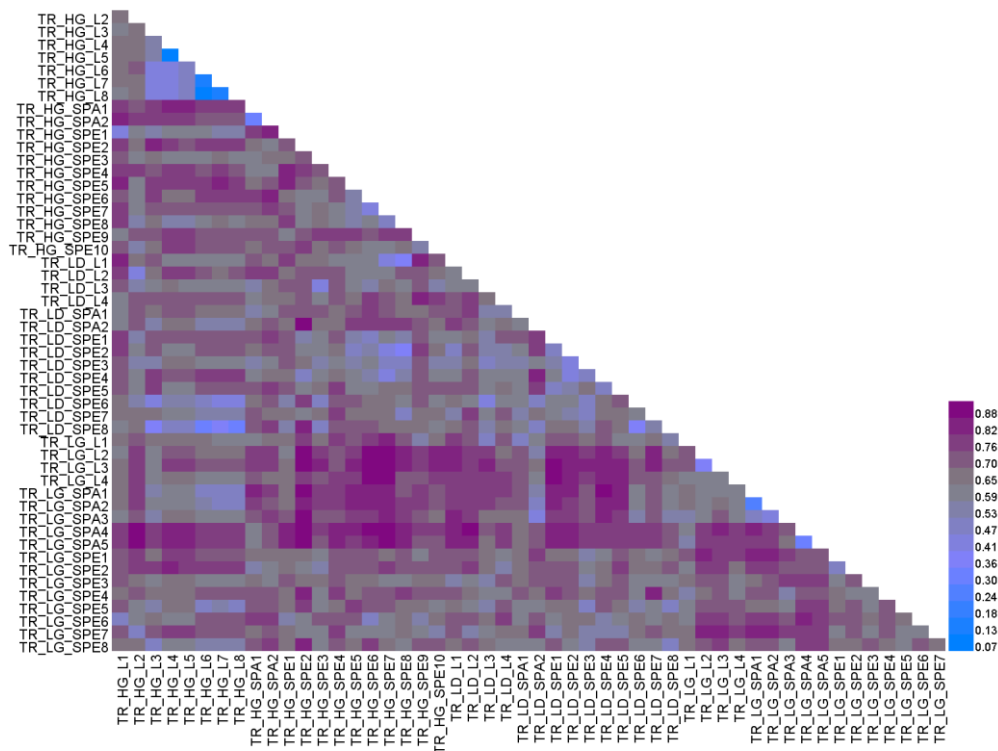

Figure S4 The coefficient divergence values for TR source profile

Note: Transportation sector (Heavy duty gasoline) source profiles from published literatures in China, SPAP and SPECIATE database. Transportation sector (Light diesel) source profiles from published literatures in China, SPAP and SPECIATE database. Transportation sector (Light duty gasoline) source profiles from published literatures in China, SPAP and SPECIATE database. Numbers represent source profile sequence number.

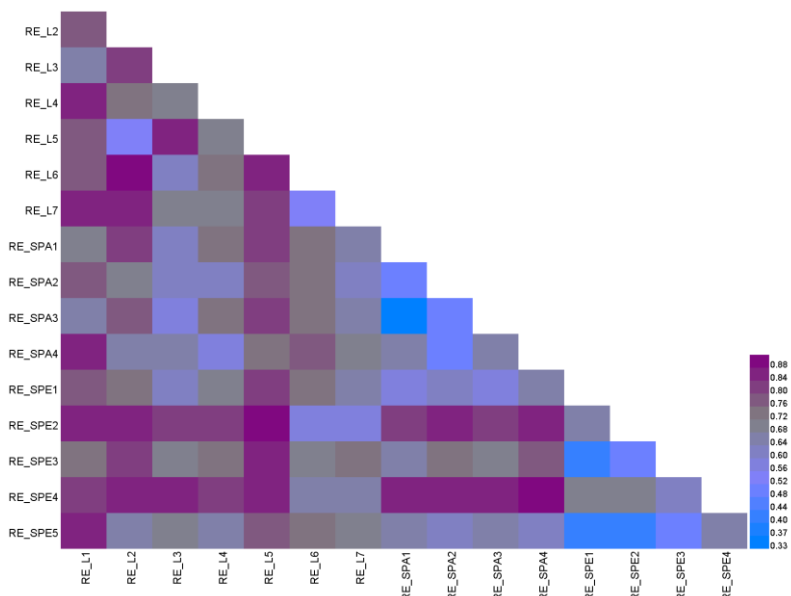

Figure S5 The coefficient divergence values for RE source profile

Note: Residential coal combustion source profiles from published literatures in China, SPAP and SPECIATE database. Numbers represent source profile sequence number.

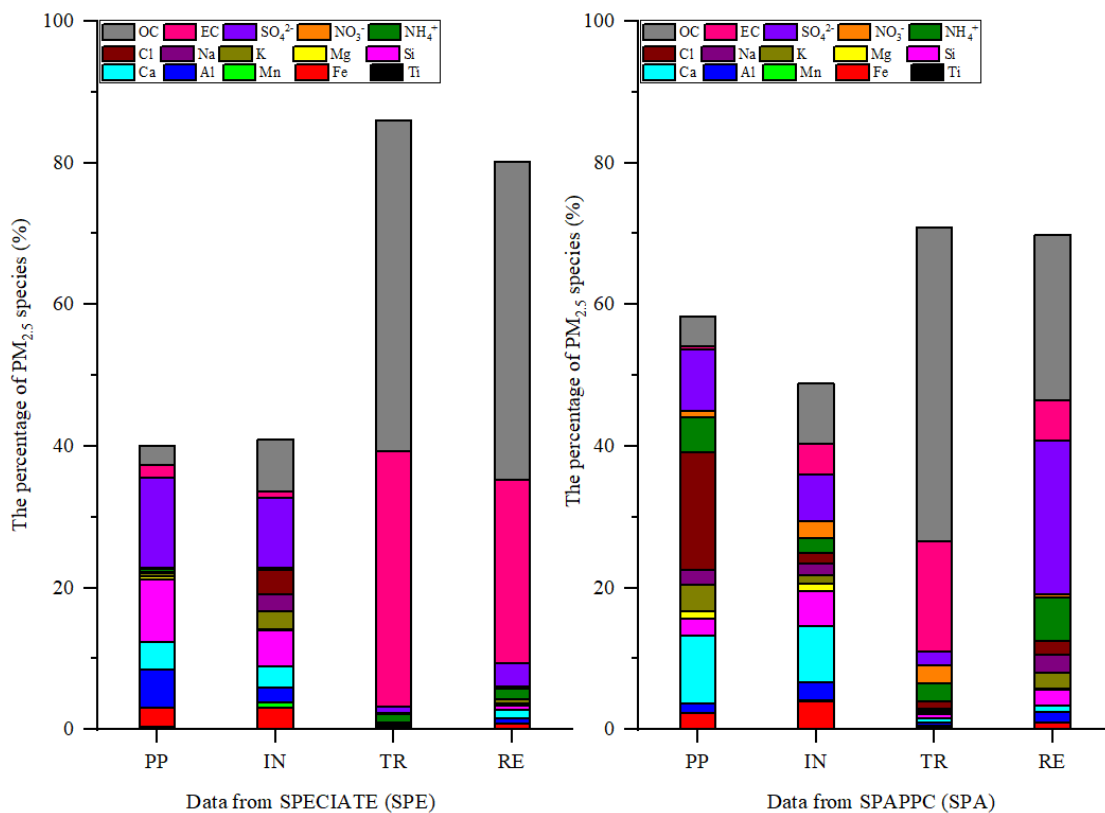

Figure S6 The selected speciation profile of PM<sub>2.5</sub> for case CMAQ\_SPE and CMAQ\_SPA

In SPE, the selected source profiles were average profile developed from original profiles of the source category group in SPECIATE database, the power plant (PP) source profile code was 91041, industrial process (IN) was 900162.5, Residential coal combustion (RE) was 91155, Transportation sector (TR) was 91022 and 91162. In SPA, the selected source profiles were from SPAPPC database which were measured from local emission sources.

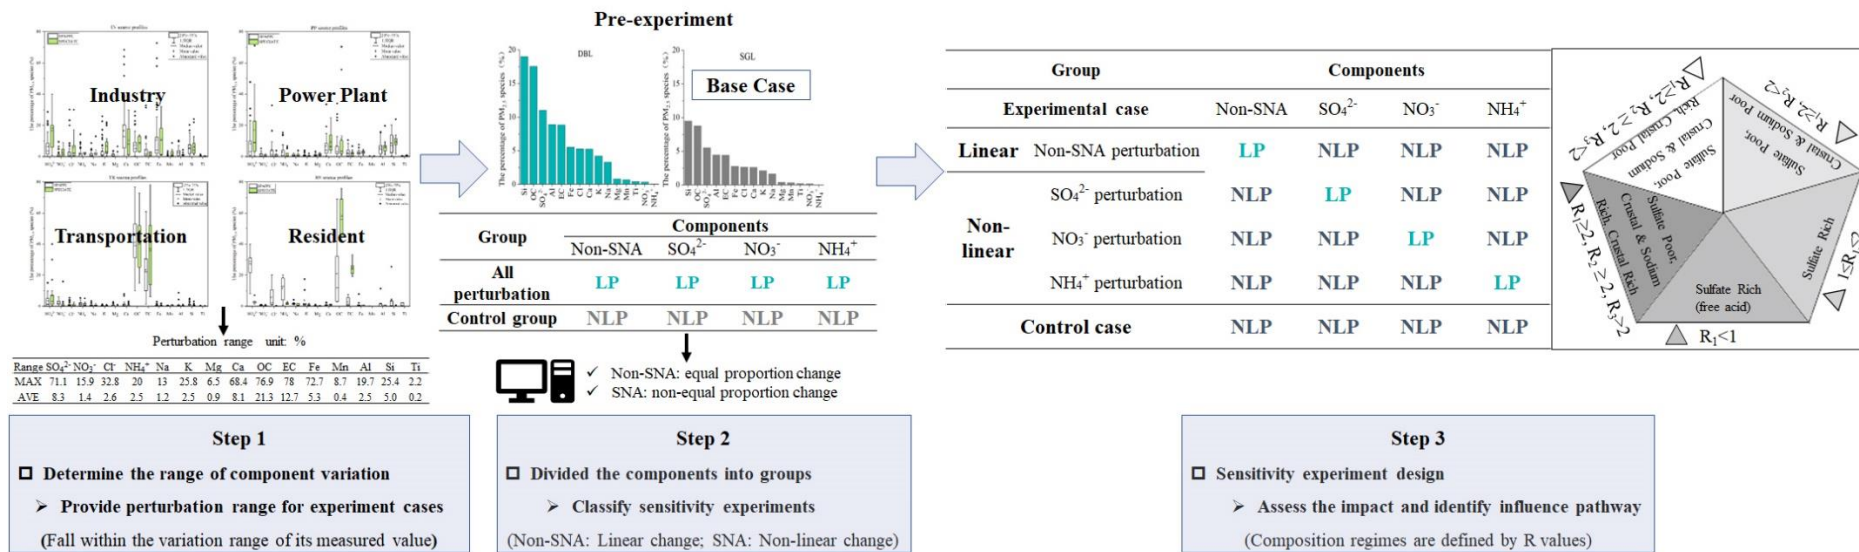

Note: SNA represent SO<sub>4</sub><sup>2-</sup>, NO<sub>3</sub><sup>-</sup>, and NH<sub>4</sub><sup>+</sup>, Non-SNA represent other components in PM<sub>2.5</sub>; LP: Load perturbation; NLP: Not load perturbation

Figure S7 The sketch of sensitivity experiment design idea

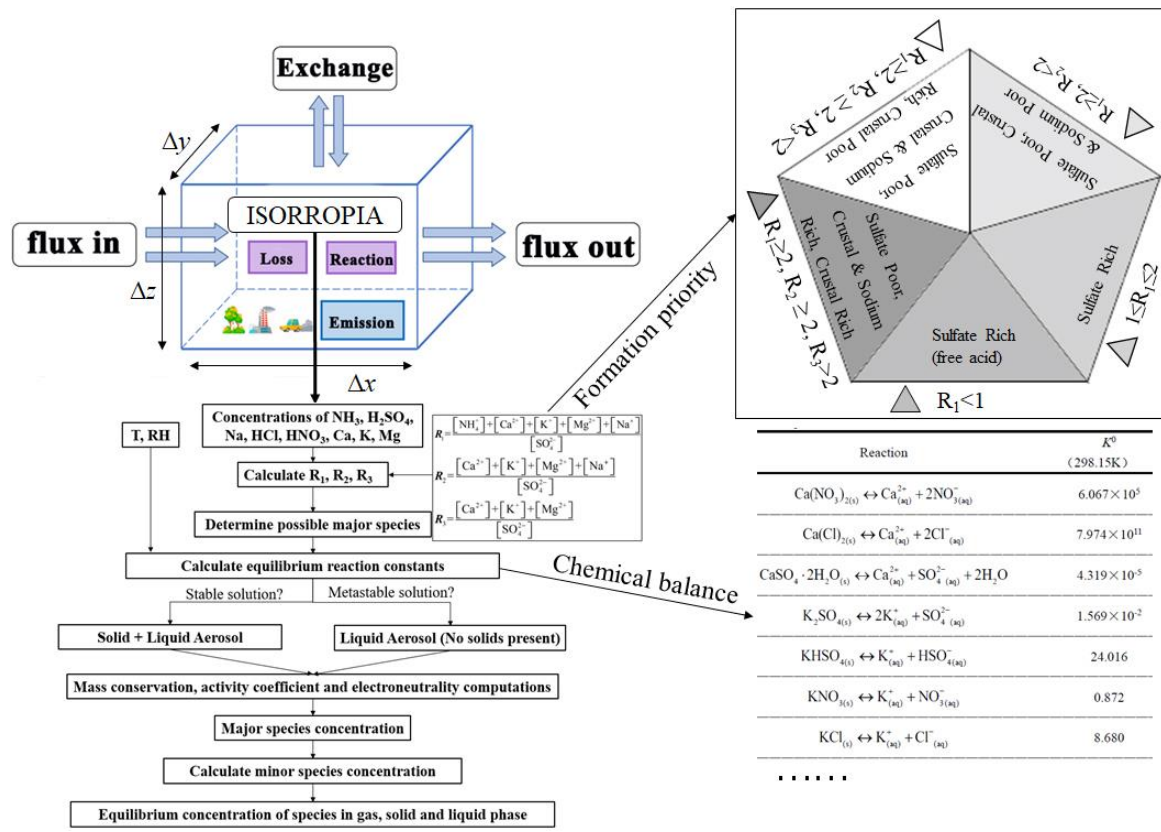

Figure S8 The general solution path of ISORROPIA for each grid at time  $t$

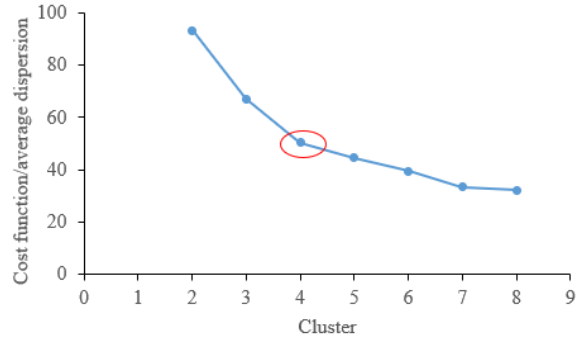

Figure S9 The elbow plot of K-mean clustering

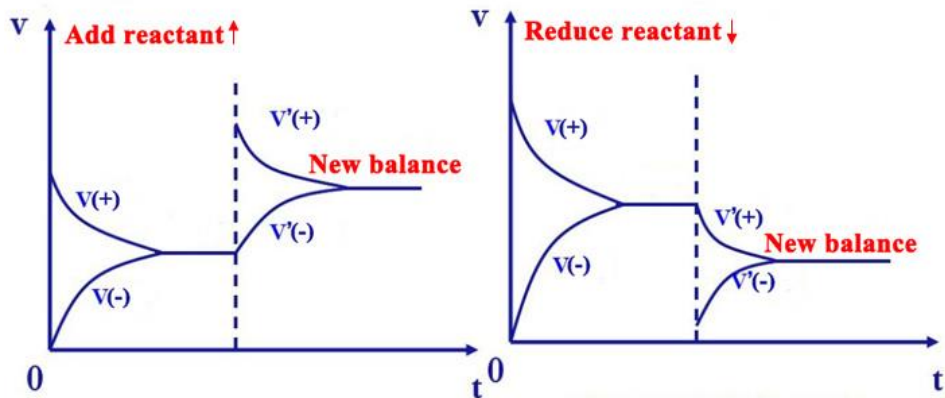

Figure S10 The shift direction of chemical reaction equilibrium

## Reference

- Bao, Z., Feng, Y. C., Jiao, Q., Hong, S. M., Liu, W. G.: Characterization and Source Apportionment of PM<sub>2.5</sub> and PM<sub>10</sub> in Hangzhou (In Chinese), *Environ. Monitor. China*, 26, 47-51, <https://doi.org/10.19316/j.issn.1002-6002.2010.02.012>, 2010.
- Bi, X., Dai, Q., Wu, J., Zhang, Q., Zhang, W., Luo, R., Cheng, Y., Zhang, J., Wang, L., Yu, Z., Zhang, Y., Tian, Y., Feng, Y.: Characteristics of the main primary source profiles of particulate matter across China from 1987 to 2017, *Atmos. Chem. Phys.*, 19, 3223-3243, <https://doi.org/10.5194/acp-19-3223-2019>, 2019.
- Chapel Hill, N.: Operational Guidance for the Community Multiscale Air Quality (CMAQ) Modeling System Version 5.0, [https://www.airqualitymodeling.org/index.php/CMAQ\\_version\\_5.0\\_\(February\\_2010\\_release\)\\_OGD#Aerosol\\_Module](https://www.airqualitymodeling.org/index.php/CMAQ_version_5.0_(February_2010_release)_OGD#Aerosol_Module), last access: February 2012.
- Chen, J., Yin, D., Zhao, Z., Kaduwela, A. P., Avise, J. C., Damassa, J. A., Beyersdorf, A., Burton, S., Ferrare, R., Herman, J. R., Kim, H., Neuman, A., Nowak, J. B., Parworth, C., Scarino, A. J., Wisthaler, A., Young, D. E., Zhang, Q.: Modeling air quality in the San Joaquin valley of California during the 2013 Discover-AQ field campaign, *Atmos. Environ.*, 5, 100067, <https://doi.org/10.1016/j.aeaqa.2020.100067>, 2020.
- Cheng, N. L., Meng, F., Wang, J. K., Chen, Y. B., Wei, X., Han, H.: Numerical simulation of the spatial distribution and deposition of PM<sub>2.5</sub> in East China coastal area in 2010 (In Chinese), *Journ. Safety Environ.*, 15, 305-310, <https://doi.org/10.13637/j.issn.1009-6094.2015.06.063>, 2015.
- Cui, H.: Study of chemical composition features and sources apportionment of airborne particles during heating period in Jincheng city (In Chinese). Taiyuan University of Technology, Taiyuan.2011
- Cui, M., Chen, Y., Feng, Y., Li, C., Zheng, J., Tian, C., Yan, C., Zheng, M.: Measurement of PM and its chemical composition in real-world emissions from non-road and on-road diesel vehicles, *Atmospheric Chemistry and Physics*, 17, 6779-6795, <https://doi.org/10.5194/acp-17-6779-2017>, 2017.
- Dai, Q., Bi, X., Song, W., Li, T., Liu, B., Ding, J., Xu, J., Song, C., Yang, N., Schulze, B. C., Zhang, Y., Feng, Y., Hopke, P. K.: Residential coal combustion as a source of primary sulfate in Xi'an, China, *Atmos. Environ.*, 196, 66-76, <https://doi.org/10.1016/j.atmosenv.2018.10.002>, 2019.
- Feng, X. Q.: Source characteristics of VOCs and PM<sub>2.5</sub> for vehicle exhausts in the Pearl River Delta region (In Chinese). South China University of Technology, Guangzhou.2013
- Foley, K. M., Roselle, S. J., Appel, K. W., Bhawe, P. V., Pleim, J., Otte, T., Mathur, R., Sarwar, G., Young, J. O., Gilliam, R.: Incremental testing of the community multiscale air quality (CMAQ) modeling system version 4.7, *Geosci. Model Dev.*, 3, 205-226, <https://doi.org/10.5194/gmd-3-205-2010>, 2010.
- Fountoukis, C., Nenes, A.: ISORROPIA II: a computationally efficient thermodynamic equilibrium model for K<sup>+</sup>-Ca<sup>2+</sup>-Mg<sup>2+</sup>-NH<sub>4</sub><sup>+</sup>-Na<sup>+</sup>-SO<sub>4</sub><sup>2-</sup>-NO<sub>3</sub><sup>-</sup>-Cl<sup>-</sup>-H<sub>2</sub>O aerosols, *Atmos. Chem. Phys.*, 7, 4639-4659, <https://doi.org/10.5194/acp-7-4639-2007>, 2007.
- Friberg, M. D., Zhai, X., Holmes, H. A., Chang, H. H., Strickland, M. J., Sarnat, S. E., Tolbert, P. E., Russell, A. G., Mulholland, J. A.: Method for Fusing Observational Data and Chemical Transport Model Simulations To Estimate Spatiotemporally Resolved Ambient Air Pollution, *Environ. Sci. Technol.*, 50, 3695-3705, <https://doi.org/10.1021/acs.est.5b05134>, 2016.
- Gao, Y., Shan, H., Zhang, S., Sheng, L., Li, J., Zhang, J., Ma, M., Meng, H., Luo, K., Gao, H., Yao, X.: Characteristics and sources of PM<sub>2.5</sub> with focus on two severe pollution events in a coastal city of

- Qingdao, China, *Chemosphere*, 247, 125861, <https://doi.org/10.1016/j.chemosphere.2020.125861>, 2020.
- Ge, S., Xu, X., Chow, J. C., Watson, J., Sheng, Q., Liu, W., Bai, Z., Zhu, T., Zhang, J.: Emissions of air pollutants from household stoves: honeycomb coal versus coal cake, *Environ. Sci. Technol.*, 38, 4612-4618, <https://doi.org/10.1021/es049942k>, 2004.
- Gong, P., Luo, Y.: Study on the characteristics of source profiles in Wuhan (In Chinese), *J. Nanjing University of Information Sci. Technol.*, 10, 579-589, <https://doi.org/10.13878/j.cnki.jnuist.2018.05.008>, 2018.
- Guo, Y., Zheng, Y., Zhu, T., Gao, X., Luo, L., Zheng, Y.: Chemical profiles of PM emitted from the iron and steel industry in northern China, *Atmos. Environ.*, 150, 187-197, <https://doi.org/10.1016/j.atmosenv.2016.11.055>, 2017.
- Hao, Y., Gao, C., Deng, S., Yuan, M., Song, W., Lu, Z., Qiu, Z.: Chemical characterisation of PM<sub>2.5</sub> emitted from motor vehicles powered by diesel, gasoline, natural gas and methanol fuel, *Sci. Total Environ.*, 674, 128-139, <https://doi.org/10.1016/j.scitotenv.2019.03.410>, 2019.
- Ho, K. F., Lee, S. C., Chow, J. C., Watson, J. G.: Characterization of PM<sub>10</sub> and PM<sub>2.5</sub> source profiles for fugitive dust in Hong Kong, *Atmos. Environ.*, 37, 1023-1032, [https://doi.org/10.1016/s1352-2310\(02\)01028-2](https://doi.org/10.1016/s1352-2310(02)01028-2), 2003.
- Kong, S. F.: Study on the chemical composition, risk assessment and emission inventory establishment for hazardous components in particulate matter from atmospheric pollution sources (In Chinese). Nankai University, Tianjin 2012
- Li, J., Han, Z., Li, J., Liu, R., Wu, Y., Liang, L., Zhang, R.: The formation and evolution of secondary organic aerosol during haze events in Beijing in wintertime, *Sci. Total Environ.*, 703, 134937, <https://doi.org/10.1016/j.scitotenv.2019.134937>, 2020.
- Liu, M., Liu, H., Geng, G., Hong, C., Liu, F., Song, Y., Tong, D., Zheng, B., Cui, H., Man, H., Zhang, Q., He, K.: Anthropogenic emission inventories in China: a review, *Natl. Sci. Rev.*, 4, 834-866, <https://doi.org/10.1093/nsr/nwx150>, 2017a.
- Liu, X. H., Zhang, Y., Olsen, K. M., Wang, W. X., Do, B. A., Bridgers, G. M.: Responses of future air quality to emission controls over North Carolina, Part I: Model evaluation for current-year simulations, *Atmos. Environ.*, 44, 2443-2456, <https://doi.org/10.1016/j.atmosenv.2010.04.002>, 2010.
- Liu, X. Y.: Emission characteristics of particulate matter from typical fixed combustion sources. Chinese Academy of Environmental Sciences, Beijing.2007
- Liu, Y., Zhang, W., Yang, W., Bai, Z., Zhao, X.: Chemical Compositions of PM<sub>2.5</sub> Emitted from Diesel Trucks and Construction Equipment, *Aerosol Sci. Eng.*, 2, 51-60, <https://doi.org/10.1007/s41810-017-0020-2>, 2018.
- Liu, Y. Y., Zhang, W. J., Bai, Z. P., Yang, W., Zhao, X., Han, B., Wang, X.: Characteristics of PM<sub>2.5</sub> Chemical Source Profiles of Coal Combustion and Industrial Process in China (In Chinese), *Res. Environ. Sci.*, 30, 1859-1868, <https://doi.org/10.13198/j.issn.1001-6929.2017.03.34>, 2017b.
- Ma, J. H.: Emission characteristics of particulates from typical production process of iron and steel enterprises. Xinan University, Chongqing.2009
- Ma, Z., Liang, Y., Zhang, J., Zhang, D., Liu, B.: PM<sub>2.5</sub> profiles of typical sources in Beijing (In Chinese), *Acta Scientiae Circumstantiae*, 35, 4043-4052, <https://doi.org/10.13671/j.hjkxxb.2015.0584>, 2015.
- Qi, K., Dai, C., Feng, Y., Yang, L.: Establishment and analysis of PM<sub>2.5</sub> industrial source profiles in Shijiazhuang City (In Chinese), *Hebei J. Ind. Sci. Technol.*, 32, 78-84,

- <https://doi.org/10.7535/hbgkj.2015yx01014>, 2015.
- Sha, T., Ma, X., Jia, H., Tian, R., Chang, Y., Cao, F., Zhang, Y.: Aerosol chemical component: Simulations with WRF-Chem and comparison with observations in Nanjing, *Atmos. Environ.*, 218, 1-14, <https://doi.org/10.1016/j.atmosenv.2019.116982>, 2019.
- Shi, Z., Li, J., Huang, L., Wang, P., Wu, L., Ying, Q., Zhang, H., Lu, L., Liu, X., Liao, H., Hu, J.: Source apportionment of fine particulate matter in China in 2013 using a source-oriented chemical transport model, *Sci. Total Environ.*, 601-602, 1476-1487, <https://doi.org/10.1016/j.scitotenv.2017.06.019>, 2017.
- Teng, J. Q., Wang, W., Jiang, S. J., Cheng, Z., Xue, Y. G.: Study on the Source Profiles of PM<sub>2.5</sub> Major Emissions in Changzhou (In Chinese), *Environ. Sci. Technol.*, 28, 56-59+64, 2015.
- Wang, G., Lang, J., Cheng, S., Yao, S., Wang, X.: Characteristics of PM<sub>2.5</sub> and hydrocarbon emitted from heavy-duty diesel vehicle (In Chinese), *China Environ. Sci.*, 35, 3581-3587, <https://doi.org/10.3969/j.issn.1000-6923.2015.12.007>, 2015.
- Wang, K., Gao, C., Wang, C. L., Tong, Y. L., Wang, S. T., Wang, R. J., Liu, Y.: Research on Emission Inventory Processing Tool based on CSGD Data (In Chinese), *Res. Environ. Sci.*, 32, 1090-1098, <https://doi.org/10.13198/j.issn.1001-6929.2019.02.13>, 2019.
- Wang, Z., Guo, J., Chen, Z.: Analysis of the source componential spectrum of PM<sub>2.5</sub> emission in Guiyang (In Chinese), *J. Safety Environ.*, 16, 346-351, <https://doi.org/10.13637/j.issn.1009-6094.2016.02.069>, 2016.
- Wen, J., Li, B., Zhang, X., Tian, Y., Huang, B., Zhu, H., Feng, Y.: PM<sub>2.5</sub> Profiles of Typical Industrial Emissions in Yantai City, China (In Chinese), *Res. Environ. Sci.*, 32, 1333-1339, <https://doi.org/10.13198/j.issn.1001-6929.2019.04.06>, 2019.
- Wen, J., Yang, J., Li, P., Yu, J., Wu, J., Feng, Y.: Chemical Source Profiles of PM Emitted from the Main Processes of the Iron and Steel Industry in China (In Chinese), *Environ. Sci.*, 39, 4885-4891, <https://doi.org/10.13227/j.hjhx.201804007>, 2018.
- Whitten, G. Z., Heo, G., Kimura, Y., McDonald-Buller, E., Allen, D. T., Carter, W. P. L., Yarwood, G.: A new condensed toluene mechanism for Carbon Bond: CB05-TU, *Atmospheric Environment*, 44, 5346-5355, <https://doi.org/10.1016/j.atmosenv.2009.12.029>, 2010.
- Xing, J., Mathur, R., Pleim, J., Hogrefe, C., Gan, C. M., Wong, D. C., Wei, C., Gilliam, R., Pouliot, G.: Observations and modeling of air quality trends over 1990–2010 across the Northern Hemisphere: China, the United States and Europe, *Atmos. Chem. Phys.*, 15, 2723-2747, <https://doi.org/10.5194/acp-15-2723-2015>, 2015.
- Yarwood, G., Rao, S., Yocke, M., Whitten, G. Z.: Updates to the Carbon Bond chemical mechanism: CB05,
- Ye, M., Guo, Y., Zhu, T., Luo, L., Du, Q.: Research on the characteristics of particulate matter emitted from the cement plants (In Chinese), *Environ. Engineering*, 35, 346-352, 2017.
- Zhang, N., Zhuang, M., Tian, J., Tian, P., Zhang, J., Wang, Q., Zhou, Y., Huang, R., Zhu, C., Zhang, X., Cao, J.: Development of source profiles and their application in source apportionment of PM<sub>2.5</sub> in Xiamen, China, *Front. Environ. Sci. Eng.*, 10, 1-13, <https://doi.org/10.1007/s11783-016-0879-1>, 2016.
- Zhang, P. F.: Study on composition source profile and characteristics of particulate matter from diesel Bus exhaust in Tianjin (In Chinese). Nankai University, Tianjin 2007
- Zhang, Q., Xue, D., Wang, S., Wang, L., Wang, J., Ma, Y., Liu, X.: Analysis on the evolution of PM<sub>2.5</sub> heavy air pollution process in Qingdao (In Chinese), *China Environ. Sci.*, 37, 3623-3635,



- <https://doi.org/10.3969/j.issn.1000-6923.2017.10.003>, 2017.
- Zhang, Y., Olsen, K. M., Wang, K.: Fine Scale Modeling of Agricultural Air Quality over the Southeastern United States Using Two Air Quality Models. Part I. Application and Evaluation, *Aerosol Air Qual. Res.*, 13, 1231-1252, <https://doi.org/10.4209/aaqr.2012.12.0346>, 2013.
- Zhang, Y., Yao, Z., Shen, X., Liu, H., He, K.: Chemical characterization of PM<sub>2.5</sub> emitted from on-road heavy-duty diesel trucks in China, *Atmospheric Environment*, 122, 885-891, <https://doi.org/10.1016/j.atmosenv.2015.07.014>, 2015.
- Zhao, H. N.: The emission characteristic and reduction strategies study on PM<sub>2.5</sub> of ferrous metal smelting (steel) industry. North China Electric Power University, Baoding.2014
- Zheng, B., Tong, D., Li, M., Liu, F., Hong, C., Geng, G., Li, H., Li, X., Peng, L., Qi, J., Yan, L., Zhang, Y., Zhao, H., Zheng, Y., He, K., Zhang, Q.: Trends in China's anthropogenic emissions since 2010 as the consequence of clean air actions, *Atmos. Chem. Phys.*, 18, 14095-14111, <https://doi.org/10.5194/acp-18-14095-2018>, 2018.
- Zheng, B., Zhang, Q., Zhang, Y., He, K. B., Wang, K., Zheng, G. J., Duan, F. K., Ma, Y. L., Kimoto, T.: Heterogeneous chemistry: a mechanism missing in current models to explain secondary inorganic aerosol formation during the January 2013 haze episode in North China, *Atmos. Chem. Phys.*, 15, 2031-2049, <https://doi.org/10.5194/acp-15-2031-2015>, 2015.
- Zheng, M., Zhang, Y., Yan, C., Fu, H., Niu, Y., Huang, K., Hu, M., Zeng, L., Liu, Q., Pei, B., Fu, Q.: Establishing PM<sub>2.5</sub> industrial source profiles in Shanghai (In Chinese), *China Environ. Sci.*, 33, 1354-1359, <https://doi.org/10.3969/j.issn.1000-6923.2013.08.002>, 2013.
